# Supplementary material for: Comprehensive life cycle assessment of the corn wet milling industry in the United States
Source: Frontiers journal article supplement (doi:10.3389/fenrg.2023.1023561), 2023-07-06
Supplement: Data_Sheet_1.pdf [file Data_Sheet_1.pdf]

## Supplemental Information – Life Cycle Inventories Used in the Study

---

### Table of Contents

|                                                                 |    |
|-----------------------------------------------------------------|----|
| <i>S1. Corn Wet Milling and Refining Inventories</i> .....      | 1  |
| S1.1 About the Inventory .....                                  | 1  |
| S1.2 Inventories.....                                           | 2  |
| S1.3 Unit Processes .....                                       | 8  |
| <i>S2. Corn Production Inventories</i> .....                    | 15 |
| S2.1 Relevant Parameters .....                                  | 15 |
| S2.2 Inventory .....                                            | 16 |
| S2.3 Unit Process(es) .....                                     | 17 |
| S2.4 Inventories & Unit processes for agrochemical inputs ..... | 19 |
| <i>S3. Agriculture Field Emissions Calculations</i> .....       | 21 |

### S1. Corn Wet Milling and Refining Inventories

#### ***S1.1 About the Inventory***

Grouping was used for the portions of the corn milling and refining process that were sufficiently similar, as defined by examination of the process structures and data provided and confirmed by comparing their LCIA and uncertainty analysis resulting in acceptable coefficients of variation. Only the refining stage was found to be intractable. Thus, starch milling, steam generation and cogeneration were grouped (cogeneration with and without coal, boiler steam with and without coal, starch milling using cogeneration with and without coal; and starch milling with boiler steam with and without coal). Corn input to Starch Milling used the aggregated corn supplied to participating CRA producers.

Separate anonymized processes were created for each site's refining, on a per pound of starch processed basis, which utilizes the appropriate grouped subprocesses. This approach also reduced the combined corn sweeteners LCIA uncertainty to a range from which meaningful interpretation of the results was possible and defensible, while simultaneously meeting confidentiality and anti-trust compliance needs. The results presented in this study are all based on this final hybrid approach. However, due to confidentiality needs, the starch refining inventory below is aggregated across the industry and unallocated.

Some notes specific to the inventory are below.

1. For starch milling, facilities were sorted into CHP or boiler and with or without coal.
2. Where possible, inputs and outputs have been assigned to specific products. Where this has not been possible, the input/output has been assigned to starch milling as every product is derived from this stage.
3. In most facilities, water use is not tracked by process/product directly, and in many cases the system is open, and storm water collected without monitoring, so that closing the water loop is not possible. Instead, we have used the available process data together with engineering models from the literature. The corn wet milling processes utilizes large quantities of steam, generated onsite in boilers largely from returning condensate. Steam production at mills is most often accompanied by electricity production (8 of 13 facilities, covering 70% of grind).

4. Water consumption in the steam and/or cogeneration processes was calculated based on total steam production following Walker, et al. 2013. For steam/power, water consumption is reflected by the quantity of water used to make up for water exiting the steam system. This compensates for blowdown losses, deaerator losses, losses from leaks, venting, etc., and water taken from the steam cycle for use in the process.
- For the purposes of this study, water originating in the utilities section of facilities ultimately used in starch milling or sweeteners production is treated as entering the system in those processes rather than included in the heat and power production module. Utilities water consumption thus includes 8% (range from > 5% to as high as 10%) for blowdown, 0.5% for deaeration, and 3% for leaks and venting losses; base uncertainty includes the range from 3% to 16% of steam flow.

### S1.2 Inventories

These tables contain the aggregated and normalized inventory data for starch milling, refining, heat or heat and electricity production, and coproduct drying based on data provided by each participating site, uncertainty and data quality notations as supplied by the participating facilities, and augmented with publicly reported data.

*Table S-1: Life Cycle Inventory for Corn Wet Milling to Starch per Bushel of Corn by Technology Grouping and Weighted Average. Industry level impacts reported in the study were modeled using the four technology types weighted by their share of annual grind (not shown).*

| Inputs & Outputs for Starch Milling                                                       | Unit (per bu) | Annual Weighted Average | Cogen - Non-coal | Cogen - with Coal | Boilers only - Non-Coal | Boilers only - with coal | Data Quality & Uncertainty Parameters |
|-------------------------------------------------------------------------------------------|---------------|-------------------------|------------------|-------------------|-------------------------|--------------------------|---------------------------------------|
| <b>PRODUCTS</b>                                                                           |               |                         |                  |                   |                         |                          |                                       |
| Starch                                                                                    | lb dm         | 32.46                   | 32.85591         | 32.58805          | 31.69970                | 32.68404                 | Using “not starch” Lognormal 1.03     |
| Germ                                                                                      | lb dm         | 3.24                    | 3.50944          | 3.22832           | 2.98041                 | 3.43452                  | Normal 0.28                           |
| Corn gluten meal (CGM) (wet)                                                              | lb dm         | 1.78                    | 2.07529          | 1.67316           | 1.86792                 | 1.82976                  | Normal 0.29                           |
| Corn gluten feed (CGF) (wet)                                                              | lb dm         | 9.40                    | 12.67            | 9.50              | 7.51                    | 8.34                     | Lognormal 1.23                        |
| <i>Corn gluten feed (wet), for dry feed</i>                                               | <i>lb dm</i>  | <i>5.89</i>             | <i>3.71412</i>   | <i>7.81792</i>    | <i>0.39372</i>          | <i>8.24197</i>           |                                       |
| <i>Corn gluten feed (wet), for wet feed</i>                                               | <i>lb dm</i>  | <i>3.50</i>             | <i>8.95688</i>   | <i>1.68444</i>    | <i>7.11691</i>          | <i>0.09383</i>           |                                       |
| Steepwater not incorporated into feed                                                     | lb dm         | 0.01525                 | 0.00105          | 0.01422           | 0.03572                 | -                        | By difference                         |
| <b>INPUTS</b>                                                                             |               |                         |                  |                   |                         |                          |                                       |
| Corn grain                                                                                | bu            | 1.00                    | 1.00             | 1.00              | 1.00                    | 1.00                     | Normal 0.1                            |
| Moisture content                                                                          | %             | 15.8%                   | 15.7%            | 15.8%             | 15.8%                   | 16.0%                    |                                       |
| Sourcing - Specific sourcing and transport for facilities not shown to preserve anonymity |               |                         |                  |                   |                         |                          |                                       |
| Energies and Fuels for primary milling (excludes LSW evaporation)                         |               |                         |                  |                   |                         |                          |                                       |
| Steam                                                                                     | BTU           | 2,271                   | 2,943            | 2,445             | 1,881                   | 1,220                    | Lognormal 1.63                        |
| Electricity                                                                               | kWh           | 1.47                    | 1.41             | 1.48              | 1.71                    | 1.07                     | Lognormal 1.33                        |
| <i>Share of electricity from grid</i>                                                     |               | <i>44%</i>              | <i>52.54%</i>    | <i>13.83%</i>     | <i>100%</i>             | <i>100%</i>              |                                       |
| Gas (NG & biogas) primary milling (steeps & clams, no LSW evap)                           | scf           | 1.31                    | 1.33             | 1.58              | 0.51                    | 1.27                     | Lognormal 2.38                        |
| <i>biogas share</i>                                                                       |               | <i>4%</i>               | <i>5.30%</i>     | <i>1.42%</i>      | <i>11.24%</i>           | <i>0.00%</i>             |                                       |

*Supplemental Information for Taylor, et al. LCA of US corn wet milling industry*

| Inputs & Outputs for Starch Milling                                                | Unit (per bu) | Annual Weighted Average | Cogen - Non-coal | Cogen - with Coal | Boilers only - Non-Coal | Boilers only - with coal | Data Quality & Uncertainty Parameters |
|------------------------------------------------------------------------------------|---------------|-------------------------|------------------|-------------------|-------------------------|--------------------------|---------------------------------------|
| Chemical Inputs                                                                    |               |                         |                  |                   |                         |                          |                                       |
| SO <sub>2</sub>                                                                    | lb            | 1.63E-02                | 4.00E-02         | 1.66E-02          | -                       | 1.64E-02                 | Normal 0.032                          |
| S                                                                                  | lb            | 1.75E-02                | -                | 2.59E-02          | 1.35E-02                | -                        | Normal 0.18                           |
| Soda ash, dense                                                                    | lb            | 7.32E-03                | 2.61E-02         | -                 | 2.05E-02                | -                        | Normal 0.024                          |
| Filter Aid (Diatomaceous Earth)                                                    | lb            | 4.10E-04                | 3.21E-03         | -                 | -                       | -                        | Normal 0.002                          |
| NaOH                                                                               | lb            | 2.91E-02                | 4.40E-03         | 2.47E-02          | 2.75E-02                | 8.73E-02                 | Normal 0.032                          |
| NaHSO <sub>3</sub>                                                                 | lb            | 2.37E-02                | 8.44E-03         | -                 | 7.72E-02                | 7.32E-02                 | Normal 0.064                          |
| NaCl                                                                               | lb            | 3.39E-05                | -                | 1.02E-05          | 1.44E-04                | -                        | Normal 0.062                          |
| HCl                                                                                | lb            | 2.34E-03                | -                | -                 | 1.20E-02                | -                        | Normal 0.011                          |
| H <sub>2</sub> SO <sub>4</sub>                                                     | lb            | 1.46E-02                | -                | 1.49E-02          | 3.01E-02                | 2.26E-03                 | Normal 0.04                           |
| Chelant                                                                            | lb            | 7.71E-05                | 6.05E-04         | -                 | -                       | -                        | Undefined                             |
| Cooling Tower Chemicals (NaOCl, polymer, anti-scalent)                             | lb            | 3.79E-05                | 2.97E-04         | -                 | -                       | -                        | Undefined                             |
| IP Enzyme                                                                          | lb            | 3.59E-06                | -                | -                 | 1.85E-05                | -                        | Undefined                             |
| Transport Distance for Chemical Inputs                                             | mi            | 50                      | 50               | 50                | 50                      | 50                       | {4,3,1,1,3} Lognormal 1.62            |
| Water Inputs -- Representative only -- Insufficient Data Quality                   |               |                         |                  |                   |                         |                          |                                       |
| <i>Estimated Effective Water Use (includes process water from other processes)</i> | total, gal    | 9.96E+00                | 1.02E+01         | 9.51E+00          | 9.83E+00                | 1.24E+01                 |                                       |
| <b>WASTES, EFFLUENTS &amp; EMISSIONS</b>                                           |               |                         |                  |                   |                         |                          |                                       |
| Outputs to Solid Waste Treatment                                                   |               |                         |                  |                   |                         |                          |                                       |
| Municipal Landfill                                                                 | lb            | 1.337E+00               | 3.29E-01         | 3.79E-02          | 6.51E+00                | 6.74E-02                 | {2,3,1,1,3} Lognormal 1.22            |
| Hazardous landfill                                                                 | lb            | 1.38E-06                | -                | -                 | 5.68E-07                | 1.22E-05                 | {4,4,1,1,2} Lognormal 1.25            |
| Incineration Facility                                                              | lb            | 1.43E-05                | -                | 1.22E-05          | 3.16E-05                | 1.12E-05                 | {4,4,1,1,2} Lognormal 1.25            |
| Hazardous incineration                                                             | lb            | 8.47E-05                | 2.39E-06         | 7.36E-05          | 2.12E-04                | 9.49E-06                 | {4,4,1,1,2} Lognormal 1.25            |
| On-site water treatment facility                                                   | lb            | 3.85E-02                | 3.02E-01         | -                 | -                       | -                        | {4,4,1,1,2} Lognormal 1.25            |
| Hazardous waste water treatment                                                    | lb            | 6.24E-09                | -                | -                 | 3.21E-08                | -                        | {4,4,1,1,2} Lognormal 1.25            |
| Recycle/Reclaim                                                                    | lb            | 1.29E-02                | 1.06E-04         | -                 | -                       | 1.24E-01                 | {4,4,1,1,2} Lognormal 1.25            |
| Hazardous Recycle/Reclaim                                                          | lb            | 1.66E-06                | -                | -                 | -                       | 1.60E-05                 | {4,4,1,1,2} Lognormal 1.25            |
| Composting                                                                         | lb            | 1.38E+01                | -                | -                 | 7.07E+01                | 1.96E-01                 | {4,4,1,1,2} Lognormal 1.25            |
| Wastewater Treatment                                                               |               |                         |                  |                   |                         |                          |                                       |
| <i>On-site water treatment facility</i>                                            |               |                         |                  |                   |                         |                          |                                       |
| Wastewater                                                                         | gal           | 5.19E+00                | 3.21E+00         | 6.53E+00          | 5.32E+00                | -                        | {4,3,1,1,3} Lognormal 1.62            |
| COD loading                                                                        | lb            | 1.12E-02                | 6.79E-02         | -                 | 1.32E-02                | -                        | {4,3,1,1,3} Lognormal 1.62            |
| BOD loading                                                                        | lb            | 5.86E-02                | -                | 1.02E-01          | 1.33E-13                | -                        | {4,3,1,1,3} Lognormal 1.62            |
| <i>Off-site water treatment facility</i>                                           |               |                         |                  |                   |                         |                          |                                       |
| Wastewater offsite (POTW)                                                          | gal           | 4.84E+00                | 5.23E+00         | 4.97E+00          | 6.54E-01                | 1.15E+01                 | {4,3,1,1,3} Lognormal 1.62            |
| Waste treatment load (TOC), lb                                                     | lb            | 1.37E-02                | 1.35E-02         | 8.30E-03          | 6.41E-04                | 6.81E-02                 | {4,3,1,1,3} Lognormal 1.62            |
| <b>Any Direct Discharges - Releases to Water and Land</b>                          |               |                         |                  |                   |                         |                          |                                       |
| <i>Direct discharge to water/Releases to Water in model year</i>                   |               |                         |                  |                   |                         |                          |                                       |
| Acids                                                                              | lb            | 4.38E-09                | 3.44E-08         | -                 | -                       | -                        | Uniform (0, 8.4E-08)                  |
| Ammonia                                                                            | lb            | 2.67E-06                | 1.26E-06         | -                 | 1.29E-05                | -                        | Uniform (0, 9.7E-5)                   |
| Dissolved solids                                                                   | lb            | 3.13E-03                | -                | -                 | -                       | 3.02E-02                 | Uniform (0, 0.08)                     |
| Suspended solids                                                                   | lb            | 7.68E-05                | -                | -                 | -                       | 7.40E-04                 | Uniform (0, 0.002)                    |
| BOD                                                                                | lb            | 1.47E-03                | -                | -                 | -                       | 1.41E-02                 | Uniform (0, 0.038)                    |

*Supplemental Information for Taylor, et al. LCA of US corn wet milling industry*

| Inputs & Outputs for Starch Milling                                                | Unit (per bu) | Annual Weighted Average | Cogen - Non-coal | Cogen - with Coal | Boilers only - Non-Coal | Boilers only - with coal | Data Quality & Uncertainty Parameters |
|------------------------------------------------------------------------------------|---------------|-------------------------|------------------|-------------------|-------------------------|--------------------------|---------------------------------------|
| Iron                                                                               | lb            | 5.59E-06                | -                | -                 | 1.33E-06                | 5.14E-05                 | Uniform (0, 1.4E-04)                  |
| Lead                                                                               | lb            | 7.36E-09                | -                | -                 | 3.78E-08                | -                        | Uniform (0, 2.9E-07)                  |
| Zinc                                                                               | lb            | 2.30E-07                | -                | -                 | 1.18E-06                | -                        | Uniform (0, 8.9E-06)                  |
| Nitrates                                                                           | lb            | 8.68E-08                | 6.80E-07         | -                 | -                       | -                        | Uniform (0, 1.4E-04)                  |
| Total Residual Chlorine                                                            | lb            | 3.73E-06                | -                | 6.50E-06          | -                       | -                        | Uniform (0, 5.4E-05)                  |
| <i>Direct discharge to land/Releases to Land (Emissions to site) in model year</i> |               |                         |                  |                   |                         |                          |                                       |
| Oils                                                                               | gal           | 1.68E-07                | -                | -                 | 8.65E-07                | -                        | Uniform (0, 1.6E-06)                  |
| Sodium Chloride                                                                    | lb            | 7.49E-08                | -                | -                 | 3.85E-07                | -                        | Uniform (0, 7E-07)                    |
| Chlorine                                                                           | gal           | 1.05E-08                | -                | -                 | 5.38E-08                | -                        | Uniform (0, 9.8E-08)                  |
| Ferric Chloride                                                                    | lb            | 1.20E-07                | -                | -                 | 6.15E-07                | -                        | Uniform (0, 1.1E-06)                  |
| Ethylene Glycol (antifreeze)                                                       | gal           | 1.12E-08                | -                | -                 | 5.77E-08                | -                        | Uniform (0, 1.05E-07)                 |
| Sodium Hypochlorite                                                                | lb            | 6.42E-07                | -                | 1.12E-06          | -                       | -                        | Uniform (0, 4.0E-06)                  |
| <i>Emissions to air (including coproduct-specific)</i>                             |               |                         |                  |                   |                         |                          |                                       |
| PM10                                                                               | lb            | 1.39E-04                | -                | 8.58E-05          | 4.64E-04                | -                        | {2,2,1,1,1} Lognormal 1.51            |
| PM2.5                                                                              | lb            | 2.78E-03                | 4.59E-03         | 1.30E-03          | 5.94E-03                | 2.77E-03                 | {2,2,1,1,1} Lognormal 1.51            |
| CO                                                                                 | lb            | 8.10E-04                | 2.06E-03         | 4.28E-04          | 8.96E-04                | 1.23E-03                 | {2,2,1,1,1} Lognormal 1.51            |
| NO2                                                                                | lb            | 1.46E-03                | 2.64E-03         | 1.82E-04          | 4.24E-03                | 1.84E-03                 | {2,2,1,1,1} Lognormal 1.51            |
| SO2                                                                                | lb            | 6.38E-04                | 8.23E-04         | 7.72E-05          | 2.10E-03                | 7.65E-04                 | {2,2,1,1,1} Lognormal 1.51            |
| VOC                                                                                | lb            | 2.59E-03                | 4.60E-03         | 1.90E-03          | 2.19E-03                | 4.63E-03                 | {2,2,1,1,1} Lognormal 1.51            |
| Acetaldehyde                                                                       | lb            | 4.63E-03                | 8.33E-03         | 2.98E-03          | 5.01E-03                | 8.53E-03                 | {2,2,1,1,1} Lognormal 1.51            |
| Acrolein                                                                           | lb            | 8.61E-05                | 3.96E-04         | 1.16E-06          | -                       | 3.36E-04                 | {2,2,1,1,1} Lognormal 1.51            |
| Methanol                                                                           | lb            | 6.44E-07                | -                | -                 | -                       | 6.21E-06                 | {2,2,1,1,1} Lognormal 1.51            |
| NH3                                                                                | lb            | 9.27E-06                | 4.97E-05         | -                 | -                       | 2.83E-05                 | {2,2,1,1,1} Lognormal 1.51            |
| Formaldehyde                                                                       | lb            | 8.31E-06                | 3.30E-05         | -                 | -                       | 3.95E-05                 | {2,2,1,1,1} Lognormal 1.51            |
| Ethylene Glycol                                                                    | lb            | 7.50E-06                | 5.56E-05         | -                 | -                       | 3.89E-06                 | {2,2,1,1,1} Lognormal 1.51            |
| Hg                                                                                 | lb            | 1.93E-06                | 2.01E-09         | -                 | 9.02E-06                | 1.70E-06                 | {2,2,1,1,1} Lognormal 1.51            |
| Pb                                                                                 | lb            | 3.11E-06                | 3.87E-09         | -                 | 1.60E-05                | 2.93E-09                 | {2,2,1,1,1} Lognormal 1.51            |
| H2SO4                                                                              | lb            | 6.92E-10                | -                | -                 | 5.49E-10                | 5.64E-09                 | {2,2,1,1,1} Lognormal 1.51            |
| HCl                                                                                | lb            | 7.95E-07                | -                | -                 | -                       | 7.66E-06                 | {2,2,1,1,1} Lognormal 1.51            |
| Dioxin and Dioxin-like Compounds                                                   | lb            | 9.70E-09                | -                | -                 | -                       | 9.35E-08                 | {2,2,1,1,1} Lognormal 1.51            |
| Corn Dust                                                                          | lb            | 4.65E-16                | -                | -                 | -                       | 4.48E-15                 | {2,2,1,1,1} Lognormal 1.51            |
| HF                                                                                 | lb            | 5.93E-03                | -                | -                 | 3.05E-02                | -                        | {2,2,1,1,1} Lognormal 1.51            |

Table S-2: Aggregated, Representative Life Cycle Inventory for Milled Starch to HFCS55, HFCS42 and DE95-100.

Refining was modeled using anonymized site models; this inventory reflects the simple production weighted inventory across all participating sites and is not reflective of any site modeled. Impacts for this inventory will differ from those calculated as a production weighted average of the confidential disaggregated refining inventories. Uncertainty parameters for each site used standard deviation if it was provided, or a data quality index (pedigree matrix) based on characteristics of the data as provided (generally 1,2,1,1,3).

| Inputs & Outputs for Starch Refining                                                                                     | Units          | Quantity |
|--------------------------------------------------------------------------------------------------------------------------|----------------|----------|
| <b>PRODUCTS</b>                                                                                                          |                |          |
| HFCS42                                                                                                                   | lb dm product  | 0.1883   |
| HFCS55                                                                                                                   | lb dm product  | 0.7493   |
| DE95/97/99                                                                                                               | lb dm product  | 0.1610   |
| <b>INPUTS</b>                                                                                                            |                |          |
| Dry Starch                                                                                                               | lb             | 1.00     |
| Energies and Fuels                                                                                                       |                |          |
| Steam                                                                                                                    | BTU            | 905      |
| Electricity                                                                                                              | kWh            | 0.064    |
| Share of electricity from grid                                                                                           | %              | 65%      |
| Natural Gas                                                                                                              | scf            | 5.49E-02 |
| Biogas                                                                                                                   | m <sup>3</sup> | 1.18E-04 |
| Chemical Inputs                                                                                                          |                |          |
| HCl                                                                                                                      | lb             | 1.72E-02 |
| NaOH                                                                                                                     | lb             | 8.51E-03 |
| Soda ash                                                                                                                 | lb             | 3.69E-03 |
| Filter Aid/Diatomaceous Earth                                                                                            | lb             | 1.92E-03 |
| Carbon                                                                                                                   | lb             | 1.03E-03 |
| Sulfuric acid                                                                                                            | lb             | 2.30E-04 |
| Ammonia                                                                                                                  | lb             | 1.80E-04 |
| Nitrogen                                                                                                                 | lb             | 3.68E-05 |
| CaCl                                                                                                                     | lb             | 4.46E-05 |
| Very small (<0.001% by mass of any product) amount of other materials including Magnesium and Sodium Salts, Carbide Lime |                |          |
| Enzymes                                                                                                                  |                |          |
| Alpha Amylase                                                                                                            | lb             | 2.71E-04 |
| Glucosyl Amylase                                                                                                         | lb             | 5.32E-04 |
| Isomerase                                                                                                                | lb             | 3.63E-04 |
| other enzymes                                                                                                            | lb             | 3.80E-05 |
| Transport Distance for Chemical Inputs                                                                                   | mi             | 50       |
| Water Inputs -- Representative only -- Insufficient Data Quality                                                         |                |          |
| Estimated Water Use (includes process water from other processes)                                                        | gal            | 0.3444   |
| Approximate Freshwater Share                                                                                             | %              | 36%      |
| <b>WASTES, EFFLUENTS &amp; EMISSIONS</b>                                                                                 |                |          |
| Outputs to Solid Waste Treatment                                                                                         |                |          |
| Physical Wastes                                                                                                          |                |          |
| Muni landfill                                                                                                            | ton            |          |
| Wastewater Treatment                                                                                                     |                |          |
| On-site water treatment facility                                                                                         |                |          |
| Wastewater offsite (POTW)                                                                                                | gal            | 0.269    |

| Inputs & Outputs for Starch Refining                             | Units  | Quantity |
|------------------------------------------------------------------|--------|----------|
| Waste treatment load (TOC), lb                                   | lb     | 0.005    |
| <i>Off-site water treatment facility</i>                         |        |          |
| Wastewater                                                       | gal    | 0.056    |
| Loading (BOD)                                                    | lb     | 0.001    |
| loading, lb/gal                                                  | lb/gal | 0.008    |
| <b>Any Direct Discharges - Releases to Water and Land</b>        |        |          |
| <i>Direct discharge to water/Releases to Water in model year</i> |        |          |
| Discharge to surge well & lake                                   | gal    | 1.59E-02 |
| Loading (TOC)                                                    | lb     | 8.43E-06 |
| TOC load                                                         | lb/gal | 1.40E-04 |
| <b>Emissions to air (including coproduct-specific)</b>           |        |          |
| Particulate matter (PM 10)                                       | lb     | 7.60E-05 |
| Particulate matter (PM 2.5)                                      | lb     | 7.17E-05 |
| Particulate matter (unspecified)                                 | lb     | 6.62E-05 |
| Carbon monoxide (CO)                                             | lb     | 1.94E-05 |
| Nitrogen oxides (NOx)                                            | lb     | 1.33E-05 |
| Sulfur dioxide (SO2)                                             | lb     | 9.84E-06 |
| VOCs                                                             | lb     | 2.39E-05 |
| HCl                                                              | lb     | 3.92E-08 |
| Acetaldehyde                                                     | lb     | 7.87E-07 |
| Ethylene Glycol                                                  | lb     | -        |
| Methanol                                                         | lb     | 1.56E-06 |
| NH3                                                              | lb     | 2.77E-07 |

*Table S-3: Life Cycle Inventory for Heat or Heat and Power Generation for Corn Refineries by Technology Group, 1MMBTU Energy Output. The outputs are in terms of net energy generated (parasitic steam and electricity use have been subtracted from total generation). Combustion emissions were calculated using the associated library unit processes.*

| Inputs & Outputs for Heat and Power Generation | Unit  | Cogen-coal | Cogen non-coal | Boilers-coal | Boilers non-coal | Data Quality & Uncertainty Parameters |
|------------------------------------------------|-------|------------|----------------|--------------|------------------|---------------------------------------|
| <b>OUTPUTS</b>                                 |       |            |                |              |                  |                                       |
| Total Energy Output                            | MMBTU | 1.00       | 1.00           | 1.00         | 1.00             |                                       |
| Electricity Produced                           | kWh   | 43.11      | 42.36          | -            | -                | Lognormal 1.66                        |
| Steam Produced                                 | MMBTU | 0.85       | 0.86           | 1.00         | 1.00             | Lognormal 1.08                        |
| <b>INPUTS</b>                                  |       |            |                |              |                  |                                       |
| <b>Energies and Fuels</b>                      |       |            |                |              |                  |                                       |
| Grid Electricity                               | kWh   | 2.03       | 1.39           | 4.10         | 5.62             | {4,4,1,1,2} Lognormal 1.24            |
| Coal                                           | lb    | 112.7      | -              | 56.3         | -                | Lognormal 2.2                         |
| Natural gas                                    | cuft  | 81.6       | 1,059          | 431.7        | 972.4            | Lognormal 3                           |
| Biogas                                         | cuft  | -          | -              | -            | -                | {2,3,1,1,3} Lognormal 1.22            |
| Corn stover                                    | lb    | 0.025      | -              | -            | -                | {2,3,1,1,3} Lognormal 1.22            |
| Wood                                           | lb    | 3.5        | -              | -            | -                | {2,3,1,1,3} Lognormal 1.22            |
| Tires                                          | lb    | 0.1        | -              | -            | -                | {2,3,1,1,3} Lognormal 1.22            |

| Inputs & Outputs for Heat and Power Generation                   | Unit | Cogen-coal | Cogen non-coal | Boilers-coal | Boilers non-coal | Data Quality & Uncertainty Parameters |
|------------------------------------------------------------------|------|------------|----------------|--------------|------------------|---------------------------------------|
| Seed Corn                                                        | lb   | 0.1        | -              | -            | -                | {2,3,1,1,3} Lognormal 1.22            |
| Chemical Inputs                                                  |      |            |                |              |                  |                                       |
| NaOH (50%)                                                       | lb   | 0.0        | 2.2            | -            | -                | {2,3,1,1,3} Lognormal 1.22            |
| Limestone                                                        | lb   | 15.2       | -              | -            | -                | {2,3,1,1,3} Lognormal 1.22            |
| HCl (22')                                                        | lb   | 0.0        | 0.7            | -            | -                | {2,3,1,1,3} Lognormal 1.22            |
| Boiler treatment chemicals (Nalco antiscaler)                    | lb   | -          | -              | 0.011        | 0.004            | {2,3,1,1,3} Lognormal 1.22            |
| Water Inputs -- Representative only -- Insufficient Data Quality |      |            |                |              |                  |                                       |
| Water                                                            | gal  | 35.5       | 73.7           | 106.4        | 22.3             | {4,3,1,1,3} Lognormal 1.62            |
| Share freshwater                                                 | %    | 19%        | 15%            | 7%           | 20%              | {4,3,1,1,3} Lognormal 1.62            |
| Share of municipal water                                         | %    | 81%        | 85%            | 93%          | 80%              | By difference                         |
| WASTES, EFFLUENTS & EMISSIONS                                    |      |            |                |              |                  |                                       |
| Outputs to Solid Waste Treatment                                 |      |            |                |              |                  |                                       |
| Municipal Landfill                                               | lb   | 487.3      | -              | 4.1          | -                | {2,3,1,1,3} Lognormal 1.22            |
| Hazardous incineration                                           | lb   | 0.0        | -              | -            | -                | {4,4,1,1,2} Lognormal 1.24            |
| Beneficial reuse/Mine and quarry reclamation of fly ash          | lb   | 22,420.6   | -              | -            | -                | {4,4,1,1,2} Lognormal 1.24            |
| Beneficial reuse/Ag land application of bed ash                  | lb   | 0.2        | -              | -            | -                | {4,4,1,1,2} Lognormal 1.24            |
| Wastewater Treatment                                             |      |            |                |              |                  |                                       |
| On-site water treatment facility                                 |      |            |                |              |                  |                                       |
| Wastewater                                                       | gal  | 1.6        | -              | -            | 12.9             | {4,3,1,1,3} Lognormal 1.62            |
| Off-site water treatment facility                                |      |            |                |              |                  |                                       |
| Wastewater                                                       | gal  | 1.2        | -              | 4.5          | -                | {4,3,1,1,3} Lognormal 1.62            |
| Any Direct Discharges - Releases to Water and Land               |      |            |                |              |                  |                                       |
| Direct discharge to water/Releases to Water in model year        |      |            |                |              |                  |                                       |
| FW Discharge, TOC load                                           | lb   | -          | 7.3            | 0.011        | -                | {4,3,1,1,3} Lognormal 1.62            |
| FW Discharge, volume                                             | gal  | -          | 0.0            | 21.257       | -                | {4,3,1,1,3} Lognormal 1.62            |
| Direct discharge to land/Releases to Land in model year          |      |            |                |              |                  | (coal users only)                     |
| Lead                                                             | lb   | 5.52E-05   | -              | 2.41E-04     | -                | Lognormal 1.43                        |
| Zinc                                                             | lb   | 1.09E-04   | -              | 4.77E-04     | -                | Lognormal 1.43                        |
| Mercury                                                          | lb   | 3.69E-07   | -              | 1.61E-06     | -                | Lognormal 1.43                        |
| Antimony                                                         | lb   | 2.53E-06   | -              | 1.10E-05     | -                | Lognormal 1.43                        |
| Arsenic                                                          | lb   | 3.93E-05   | -              | 1.71E-04     | -                | Lognormal 1.43                        |
| Barium                                                           | lb   | 1.03E-03   | -              | 4.49E-03     | -                | Lognormal 1.43                        |
| Beryllium                                                        | lb   | 2.19E-05   | -              | 9.57E-05     | -                | Lognormal 1.43                        |
| Chromium                                                         | lb   | 2.66E-04   | -              | 1.16E-03     | -                | Lognormal 1.43                        |
| Cobalt                                                           | lb   | 7.26E-05   | -              | 3.17E-04     | -                | Lognormal 1.43                        |
| Copper                                                           | lb   | 2.08E-04   | -              | 9.07E-04     | -                | Lognormal 1.43                        |
| Manganese                                                        | lb   | 2.52E-04   | -              | 1.10E-03     | -                | Lognormal 1.43                        |
| Nickel                                                           | lb   | 1.42E-04   | -              | 6.18E-04     | -                | Lognormal 1.43                        |
| Selenium                                                         | lb   | 8.09E-06   | -              | 3.53E-05     | -                | Lognormal 1.43                        |
| Vanadium                                                         | lb   | 3.10E-04   | -              | 1.35E-03     | -                | Lognormal 1.43                        |

Table S-4: Life Cycle Inventory for Dry Corn Germ and Corn Gluten Meal

| Dry Corn Germ Inventory               | Unit, per lb dry germ | Production Weighted Average | Cogen - Non-coal | Cogen - with Coal | Boilers only - Non-Coal | Boilers only - with coal |
|---------------------------------------|-----------------------|-----------------------------|------------------|-------------------|-------------------------|--------------------------|
| <i>Output</i>                         |                       |                             |                  |                   |                         |                          |
| Dry Germ (3-4% moisture)              | lb dm                 | 1.00                        | 1.00             | 1.00              | 1.00                    | 1.00                     |
| <i>Inputs</i>                         |                       |                             |                  |                   |                         |                          |
| Wet germ, dry basis                   | lb dm                 | 1.00                        | 1.00             | 1.00              | 1.00                    | 1.00                     |
| Steam                                 | BTU                   | 1,370                       | 996              | 1,507             | 1,225                   | 1,392                    |
| Electricity                           | kWh                   | 0.0557                      | 0.0580           | 0.0541            | 0.0348                  | 0.0984                   |
| <i>share of electricity from grid</i> |                       | 44%                         | 52.54%           | 13.83%            | 100%                    | 100%                     |
| Gas (natural gas, biogas)             | scf                   | 0.3461                      | 0.5829           | 0.1735            | 0.3921                  | 0.8640                   |
| <i>biogas share</i>                   |                       | 4%                          | 5.30%            | 1.42%             | 11.24%                  | 0.00%                    |
| Coal                                  | lb                    | 0.0003                      | -                | 0.0005            | -                       | -                        |
| Wood                                  | lb                    | 0.0131                      | -                | 0.0234            | -                       | -                        |

| Dry Corn Gluten Meal (CGM) Inventory  | Unit, per lb dry germ | Production Weighted Average | Cogen - Non-coal | Cogen - with Coal | Boilers only - Non-Coal | Boilers only - with coal |
|---------------------------------------|-----------------------|-----------------------------|------------------|-------------------|-------------------------|--------------------------|
| <i>Output</i>                         |                       |                             |                  |                   |                         |                          |
| Dry CGM (3-4% moisture)               | lb dm                 | 1.00                        | 1.00             | 1.00              | 1.00                    | 1.00                     |
| <i>Inputs</i>                         |                       |                             |                  |                   |                         |                          |
| Wet CGM, dry basis                    | lb dm                 | 273                         | 236.95           | 309.54            | 303.64                  | 77.78                    |
| Steam                                 | BTU                   | 0.1179                      | 0.0920           | 0.1354            | 0.0498                  | 0.1821                   |
| Electricity                           | kWh                   | 1.8387                      | 1.6686           | 1.7795            | 2.4347                  | 1.2909                   |
| <i>share of electricity from grid</i> | %                     | 44%                         | 52.54%           | 13.83%            | 100%                    | 100%                     |
| Gas (natural gas, biogas)             | scf                   | 0.0257                      | -                | 0.0457            | -                       | -                        |
| <i>biogas share</i>                   | %                     | 4%                          | 5.30%            | 1.42%             | 11.24%                  | 0.00%                    |
| Coal                                  | lb                    | 0.0006                      | -                | 0.0010            | -                       | -                        |
| Wood                                  | lb                    | 0.0257                      | -                | 0.0457            | -                       | -                        |

### S1.3 Unit Processes

Table S-1: Unit Processes used for the HFCS55 – Heat and Power Generation (parameter values and data quality factors in Table S-3)

| Product(s)/Processes                  | Unit | Quantity Notes                                           |
|---------------------------------------|------|----------------------------------------------------------|
| <b>Products</b>                       |      |                                                          |
| Boiler Steam - technology family i    | BTU  | heat production for aggregate technology family i        |
| CHP Steam - technology family i       | BTU  | heat production for aggregate technology family i        |
| CHP Electricity - technology family i | kWh  | electricity production for aggregate technology family i |



| Product(s)/Processes                                                                                                                                                                                    | Unit           | Quantity Notes                                                                             |
|---------------------------------------------------------------------------------------------------------------------------------------------------------------------------------------------------------|----------------|--------------------------------------------------------------------------------------------|
| <b>Inputs</b>                                                                                                                                                                                           |                |                                                                                            |
| _Bituminous coal, for use in industrial boiler/U.S. split from Bituminous coal, combusted in industrial boiler/U.S.                                                                                     | lb             | amt_coal reported for aggregate technology family i                                        |
| _Combustion of Bituminous coal no upstream, combusted in industrial boiler/U.S.                                                                                                                         | lb             | amt_coal reported for aggregate technology family i *FfP_combustion                        |
| _Natural gas, for use with combusted in industrial boiler/U.S. U.S.LCI per m3 NG                                                                                                                        | m <sup>3</sup> | amt_natgas reported for aggregate technology family i                                      |
| _Combustion of Natural gas, combusted in industrial boiler no upstream/U.S. U.S.LCI per m3 NG                                                                                                           | m <sup>3</sup> | amt_natgas reported for aggregate technology family i *FfP_combustion                      |
| Wood chips, wet, measured as dry mass {RoW}  market for   Cut-off, U                                                                                                                                    | lb             | amt_wood reported for aggregate technology family i                                        |
| _Combustion of Wood Chips, extracted from Heat, district or industrial, other than natural gas {MRO, U.S. only}   heat and power co-generation, wood chips, 6667 kW, state-of-the-art 2014   Cut-off, U | lb             | amt_wood reported for aggregate technology family i *FfP_combustion                        |
| _Combustion of Biogas no upstream, extracted from Heat, central or small-scale, other than natural gas {MRO, U.S. only}   heat and power co-generation, biogas, gas engine   Cut-off, U                 | m <sup>3</sup> | amt_biogas reported for aggregate technology family i *FfP_combustion                      |
| _Combustion of Proxy Waste Tire, extracted from Waste rubber, unspecified {RoW}  treatment of municipal incineration   Cut-off, U                                                                       | lb             | amt_tire reported for aggregate technology family i *FfP_combustion                        |
| Corn stover, production, average, U.S., 2022/kg/RNA                                                                                                                                                     | lb             | amt_stoverstraw reported for aggregate technology family i                                 |
| _Combustion of Stover or Straw no upstream, extracted from Heat, district or industrial, other than natural gas {GLO}  heat production, straw, at furnace 300kW   Cut-off, U                            | lb             | amt_stoverstraw reported for aggregate technology family i * FfP_combustion                |
| corn grain, delivered to mill, hfcs average mix, per kg                                                                                                                                                 | lb             | amt_corngrain reported for aggregate technology family i                                   |
| _Combustion of AD waste, extracted from Heat, for reuse in municipal waste incineration only {CH}  treatment of digester sludge, municipal incineration with fly ash extraction   Cut-off, U            | lb             | amt_stoverstraw reported for aggregate technology family i *FfP_combustion                 |
| Sodium hydroxide, without water, in 50% solution state {GLO}  market for   Cut-off, U                                                                                                                   | lb             | 0.5*amt_NaOH reported for aggregate technology family i                                    |
| Hydrochloric acid, without water, in 30% solution state {RoW}  market for   Cut-off, U                                                                                                                  | lb             | 0.35*amt_HCl reported for aggregate technology family i                                    |
| Limestone, crushed, for mill {RoW}  market for limestone, crushed, for mill   Cut-off, U                                                                                                                | lb             | amt_limestone reported for aggregate technology family i                                   |
| __Tap water {MRO}  market for   Cut-off, U                                                                                                                                                              | lb             | water_use_muni* reported for aggregate technology family i                                 |
| Water, unspecified natural origin, U.S.                                                                                                                                                                 | gal            | water_use_fresh* reported for aggregate technology family i                                |
| <b>Electricity/Heat</b>                                                                                                                                                                                 |                |                                                                                            |
| _Electricity, high voltage {MRO, U.S. only}   2018 EIA NERC production mix   Cut-off, U                                                                                                                 | kWh            | amt_grid_elec for aggregate technology family i                                            |
| Boiler Steam - non-coal sites                                                                                                                                                                           | kWh            | non-zero only for (technology family i = non-cogeneration without coal), parasitic steam   |
| Boiler Steam - coal-burning sites                                                                                                                                                                       | BTU            | non-zero only for (technology family i=non-cogeneration with coal), parasitic stream       |
| CHP Steam - non-coal sites                                                                                                                                                                              | BTU            | non-zero only for (technology family i = cogeneration without coal), parasitic steam       |
| CHP Steam - coal sites                                                                                                                                                                                  | BTU            | non-zero only for (technology family i = cogeneration with coal), parasitic steam          |
| CHP Electricity - non-coal sites                                                                                                                                                                        | kWh            | non-zero only for (technology family i = cogeneration without coal), parasitic electricity |
| CHP Electricity - coal sites                                                                                                                                                                            | kWh            | non-zero only for (technology family i = cogeneration with coal), parasitic electricity    |

| Product(s)/Processes                                                                                             | Unit           | Quantity Notes                                                                       |
|------------------------------------------------------------------------------------------------------------------|----------------|--------------------------------------------------------------------------------------|
| CHP Steam - non-coal sites                                                                                       | BTU            | non-zero only for (technology family i = cogeneration without coal), parasitic steam |
| <b>Waste to Treatment</b>                                                                                        |                |                                                                                      |
| Wastewater, average {RoW}  market for wastewater, average   Cut-off, U                                           | gal            | wwt_muni                                                                             |
| Wastewater, average {RoW}  market for wastewater, average   Cut-off, U                                           | m <sup>3</sup> | wwt_onsite reported for aggregate technology family i                                |
| Hard coal ash {RoW}  treatment of residual material landfill   Cut-off, U                                        | lb             | landfill_muni reported for aggregate technology family i                             |
| Hazardous waste, for incineration {RoW}  treatment of hazardous waste, hazardous waste incineration   Cut-off, U | lb             | incineration_hazardous reported for aggregate technology family i                    |
| <b>Final Waste Flows</b>                                                                                         |                |                                                                                      |
| Waste returned to mine                                                                                           | lb             | quarry_reclamation reported for aggregate technology family i                        |
| <b>Emissions to Air</b>                                                                                          |                |                                                                                      |
| Calculated using combustion processes                                                                            |                |                                                                                      |
| <b>Emissions to water</b>                                                                                        |                |                                                                                      |
| TOC, Total Organic Carbon                                                                                        | lb             | amt_direct_discharge for technology family i                                         |
| <b>Emissions to soil</b>                                                                                         |                |                                                                                      |
| Lead                                                                                                             | lb             | amt_lead reported for aggregate technology family i                                  |
| Zinc                                                                                                             | lb             | amt_zinc reported for aggregate technology family i                                  |
| Mercury                                                                                                          | lb             | amt_mercury reported for aggregate technology family i                               |
| Antimony                                                                                                         | lb             | amt_antimony reported for aggregate technology family i                              |
| Arsenic                                                                                                          | lb             | amt_arsenic reported for aggregate technology family i                               |
| Barium                                                                                                           | lb             | amt_barium reported for aggregate technology family i                                |
| Beryllium                                                                                                        | lb             | amt_beryllium reported for aggregate technology family i                             |
| Chromium                                                                                                         | lb             | amt_chromium reported for aggregate technology family i                              |
| Cobalt                                                                                                           | lb             | amt_cobalt reported for aggregate technology family i                                |
| Copper                                                                                                           | lb             | amt_copper reported for aggregate technology family i                                |
| Manganese                                                                                                        | lb             | amt_manganese reported for aggregate technology family i                             |
| Nickel                                                                                                           | lb             | amt_nickel reported for aggregate technology family i                                |
| Selenium                                                                                                         | lb             | amt_selenium reported for aggregate technology family i                              |
| Vanadium                                                                                                         | lb             | amt_vanadium reported for aggregate technology family i                              |

Table S-2: Unit Processes used for HFCS55 - Starch Milling (representative parameter values and data quality factors in Table S-1)

| Product(s)/Processes                                         | Unit | Quantity Note                                                                                                                  |
|--------------------------------------------------------------|------|--------------------------------------------------------------------------------------------------------------------------------|
| <b>Products</b>                                              |      |                                                                                                                                |
| milled starch - (technology family i)                        | lb   | 1                                                                                                                              |
| starch milling coproducts before drying - boilers coal sites | lb   | combined<br>mass_germ+mass_corn_gluten_meal+mass_corn_gluten_feed+mass_other_milling_outputs for aggregate technology family i |

| Product(s)/Processes                                                                                                                                                                                                | Unit           | Quantity Note                                                                                  |
|---------------------------------------------------------------------------------------------------------------------------------------------------------------------------------------------------------------------|----------------|------------------------------------------------------------------------------------------------|
| <b>Inputs</b>                                                                                                                                                                                                       |                |                                                                                                |
| per bu corn grain, delivered to mill, hfcs average mix, per bu                                                                                                                                                      | p              | 1/starch recovered for aggregate technology family i                                           |
| Sodium hydroxide, without water, in 50% solution state {GLO}  market for   Cut-off, U                                                                                                                               | lb             | mass_caustic50 for aggregate technology family i + mass_naoh for aggregate technology family i |
| Soda ash, dense {GLO}  market for   Cut-off, U                                                                                                                                                                      | lb             | mass_soda_ash for aggregate technology family i                                                |
| Sulfur dioxide, liquid {RoW}  market for   Cut-off, U                                                                                                                                                               | lb             | mass_SO2 for aggregate technology family i                                                     |
| Sulfur {GLO}  market for   Cut-off, U                                                                                                                                                                               | lb             | mass_S for aggregate technology family i                                                       |
| Sulfuric acid {RoW}  market for sulfuric acid   Cut-off, U                                                                                                                                                          | lb             | mass_H2SO4 for aggregate technology family i                                                   |
| Sodium sulfite {RoW}  market for sodium sulfite   Cut-off, U                                                                                                                                                        | lb             | mass_NAHSO3 for aggregate technology family i                                                  |
| Sodium chloride, brine solution {RoW}  production   Cut-off, U                                                                                                                                                      | lb             | mass_NaCl_sln for aggregate technology family i                                                |
| Balanced Salt Solution                                                                                                                                                                                              | lb             | mass_bss for aggregate technology family i                                                     |
| Tap water, market for {MRO}                                                                                                                                                                                         | gal            | vol_muniwater for aggregate technology family i                                                |
| Water, unspecified natural origin/m3                                                                                                                                                                                | gal            | vol_freshwater for aggregate technology family i                                               |
| Diatomite                                                                                                                                                                                                           | lb             | mass_filteraid for aggregate technology family i                                               |
| Transport, freight, lorry 16-32 metric ton, euro6 {RoW}  market for transport, freight, lorry 16-32 metric ton, EURO6   Cut-off, U                                                                                  | tmi<br>*       | mass_chemicals for aggregate technology family i * chemicals_distance                          |
| <b>Energy &amp; Fuels</b>                                                                                                                                                                                           |                |                                                                                                |
| _Bituminous coal, for use in industrial boiler/U.S. split from Bituminous coal, combusted in industrial boiler/U.S.                                                                                                 | lb             | amt_coal for aggregate technology family i                                                     |
| _Combustion of Bituminous coal no upstream, combusted in industrial boiler/U.S.                                                                                                                                     | lb             | amt_coal for aggregate technology family i                                                     |
| _Natural gas, for use with combusted in industrial boiler/U.S. U.S.LCI per m3 NG                                                                                                                                    | m <sup>3</sup> | amt_natgas for aggregate technology family i                                                   |
| _Combustion of Natural gas, combusted in industrial boiler no upstream/U.S. U.S.LCI per m3 NG                                                                                                                       | m <sup>3</sup> | amt_natgas for aggregate technology family i                                                   |
| Biogas {RoW}  treatment of sewage sludge by anaerobic digestion   Cut-off, U                                                                                                                                        | m <sup>3</sup> | amt_biogas for aggregate technology family i                                                   |
| _Combustion of Biogas no upstream, extracted from Heat, central or small-scale, other than natural gas {MRO, U.S. only}   heat and power co-generation, biogas, gas engine   Cut-off, U                             | m <sup>3</sup> | amt_biogas for aggregate technology family i                                                   |
| Bundle, energy wood, measured as dry mass {GLO}  market for   Cut-off, U                                                                                                                                            | lb             | mass_wood for aggregate technology family i                                                    |
| _Combustion of Wood Chips no upstream, extracted from Heat, district or industrial, other than natural gas {MRO, U.S. only}   heat and power co-generation, wood chips, 6667 kW, state-of-the-art 2014   Cut-off, U | lb             | mass_wood for aggregate technology family i                                                    |
| _Electricity, high voltage {MRO, U.S. only}   2018 EIA NERC production mix   Cut-off, U                                                                                                                             | kWh            | amt_gridelec for aggregate technology family i                                                 |
| Boiler Steam - non-coal sites                                                                                                                                                                                       | BTU            | non-zero only for (technology family i = non-cogeneration without coal)                        |
| Boiler Steam - coal-burning sites                                                                                                                                                                                   | BTU            | non-zero only for (technology family i=non- cogeneration with coal)                            |
| CHP Steam - non-coal sites                                                                                                                                                                                          | BTU            | non-zero only for (technology family i = cogeneration without coal)                            |
| CHP Steam - coal sites                                                                                                                                                                                              | BTU            | non-zero only for (technology family i = cogeneration with coal)                               |
| CHP Electricity - non-coal sites                                                                                                                                                                                    | kWh            | non-zero only for (technology family i = cogeneration without coal)                            |
| CHP Electricity - coal sites                                                                                                                                                                                        | kWh            | non-zero only for (technology family i = cogeneration with coal)                               |
| <b>Waste to Treatment</b>                                                                                                                                                                                           |                |                                                                                                |

| Product(s)/Processes                                                                                             | Unit | Quantity Note                                             |
|------------------------------------------------------------------------------------------------------------------|------|-----------------------------------------------------------|
| Limestone residue {RoW}  treatment of inert material landfill   Cut-off, U                                       | lb   | landfill_mass for aggregate technology family i           |
| Hazardous waste, for incineration {RoW}  treatment of hazardous waste, hazardous waste incineration   Cut-off, U | lb   | haz_incin_mass for aggregate technology family i          |
| Wastewater, unpolluted {RoW}  market for wastewater, unpolluted   Cut-off, U                                     | gal  | wwt_muni for aggregate technology family i                |
| Wastewater from maize starch production {GLO}  market for   Cut-off, U                                           | gal  | wwt_onsite for aggregate technology family i              |
| <b>Final Waste Flows</b>                                                                                         |      |                                                           |
| Waste to recycling                                                                                               | lb   | Amt_rec for aggregate technology family i                 |
| Hazardous waste, recovery                                                                                        | lb   | Amt_hazrec for aggregate technology family i              |
| Compost                                                                                                          | lb   | Amt_Composting for aggregate technology family i          |
| <b>Emissions to Air</b>                                                                                          |      |                                                           |
| Particulates, < 10 um                                                                                            | lb   | Aamt_PM10 for aggregate technology family i               |
| Particulates, < 2.5 um                                                                                           | lb   | Aamt_PM25 for aggregate technology family i               |
| Carbon monoxide                                                                                                  | lb   | Aamt_CO for aggregate technology family i                 |
| Nitrogen dioxide                                                                                                 | lb   | Aamt_NO2 for aggregate technology family i                |
| Sulfur dioxide                                                                                                   | lb   | Aamt_SO2 for aggregate technology family i                |
| VOC, volatile organic compounds, unspecified origin                                                              | lb   | Aamt_VOC for aggregate technology family i                |
| Acetaldehyde                                                                                                     | lb   | Aamt_Acetaldehyde for aggregate technology family i       |
| Acrolein                                                                                                         | lb   | Aamt_Acrolein for aggregate technology family i           |
| Ammonia                                                                                                          | lb   | Aamt_NH3 for aggregate technology family i                |
| Methanol                                                                                                         | lb   | Aamt_Methanol for aggregate technology family i           |
| Formaldehyde                                                                                                     | lb   | Aamt_Formaldehyde for aggregate technology family i       |
| Ethylene glycol                                                                                                  | lb   | Aamt_EthyleneGlycol for aggregate technology family i     |
| Mercury                                                                                                          | lb   | Aamt_Hg for aggregate technology family i                 |
| Lead                                                                                                             | lb   | Aamt_Pb for aggregate technology family i                 |
| Hydrogen chloride                                                                                                | lb   | Aamt_HCl for aggregate technology family i                |
| Dioxins (unspec.)                                                                                                | lb   | Amt_dioxins for aggregate technology family i             |
| <b>Emissions to Water</b>                                                                                        |      |                                                           |
| Ammonia                                                                                                          | lb   | Wamt_Ammonia for aggregate technology family i            |
| Iron                                                                                                             | lb   | Wamt_Iron for aggregate technology family i               |
| Lead                                                                                                             | lb   | Wamt_Lead for aggregate technology family i               |
| Zinc                                                                                                             | lb   | Wamt_Zinc for aggregate technology family i               |
| Acids, unspecified                                                                                               | lb   | Wamt_Acids for aggregate technology family i              |
| Cyanide compounds                                                                                                | lb   | Wamt_Cyanides for aggregate technology family i           |
| Suspended solids, unspecified                                                                                    | lb   | Wamt_SuspendedSolids for aggregate technology family i    |
| BOD5, Biological Oxygen Demand                                                                                   | lb   | Wamt_BOD for aggregate technology family i                |
| TOC, Total Organic Carbon                                                                                        | lb   | Wamt_DissolvedSolids for aggregate technology family i    |
| Oils, unspecified                                                                                                | lb   | Wamt_Oils for aggregate technology family i               |
| Phenols, unspecified                                                                                             | lb   | Wamt_Phenols for aggregate technology family i            |
| Nitrate compounds                                                                                                | lb   | Wamt_NitrateCmpds for aggregate technology family i       |
| Chlorine                                                                                                         | lb   | Wamt_Chlorine for aggregate technology family i           |
| Sodium chloride                                                                                                  | lb   | Wamt_NaCl for aggregate technology family i               |
| <b>Emissions to Soil</b>                                                                                         |      |                                                           |
| Oils, unspecified                                                                                                | lb   | Samt_Oils for aggregate technology family i               |
| Sodium hypochlorite                                                                                              | lb   | Samt_SodiumHypochlorite for aggregate technology family i |
| Iron III                                                                                                         | lb   | Samt_FerricChloride for aggregate technology family i     |
| Chlorine                                                                                                         | lb   | Samt_Chlorine for aggregate technology family i           |
| Ethylene glycol                                                                                                  | lb   | Samt_EthyleneGlycol for aggregate technology family i     |

Table S-3: Unit Process for HFCS55 - Starch Refining (representative parameter values in Table S-2, data quality factors based on site)

| Product(s)/Processes                                                                                | Unit | Quantity Note                                                           |
|-----------------------------------------------------------------------------------------------------|------|-------------------------------------------------------------------------|
| <b>Products</b>                                                                                     |      |                                                                         |
| hfcs55 - Site X (technology family i)                                                               | lb   | mass_hfcs55                                                             |
| hfcs42 - Site X (technology family i)                                                               | lb   | mass_hfcs42                                                             |
| de9597 - Site X (technology family i)                                                               | lb   | mass_de9597                                                             |
| other syrups - Site X (technology family i)                                                         | lb   | mass_csu_other_syrups                                                   |
| <b>Inputs</b>                                                                                       |      |                                                                         |
| milled starch - boilers non-coal sites                                                              | lb   | non-zero only for (technology family i = non-cogeneration without coal) |
| milled starch - boilers coal sites                                                                  | lb   | non-zero only for (technology family i=non- cogeneration with coal)     |
| milled starch - cogen non-coal sites                                                                | lb   | non-zero only for (technology family i = cogeneration without coal)     |
| milled starch - cogen coal sites                                                                    | lb   | non-zero only for (technology family i = cogeneration with coal)        |
| __Tap water {MRO}  market for   Cut-off, U                                                          | lb   | amt_muniwater for Site X                                                |
| Water, deionised, from tap water, at user {MRO}  production   Cut-off, U                            | lb   | amt_diwater for Site X                                                  |
| Water, fresh                                                                                        | gal  | amt_freshwater for Site X                                               |
| Diatomite, land                                                                                     | lb   | amt_fileraid for Site X                                                 |
| Enzyme, Alpha-amylase, Novozyme Liquezyme/kg/RER                                                    | lb   | amt_alphaamylasefor Site X                                              |
| Enzyme, Glucoamylase, Novozyme Spirizyme/kg/RER                                                     | lb   | amt_glucoamylase for Site X                                             |
| Enzymes {RoW}  enzymes production   Cut-off, U                                                      | lb   | amt_isomerase for Site X                                                |
| Enzymes {GLO}  market for enzymes   Cut-off, U                                                      | lb   | amt_otherenzymesfor Site X                                              |
| Hydrochloric acid, Mannheim process (30% HCl), at plant/RER Mass                                    | lb   | amt_HClfor Site X                                                       |
| Sodium hydroxide, without water, in 50% solution state {GLO}  market for   Cut-off, U               | lb   | amt_NaOHfor Site X                                                      |
| Soda ash, dense {GLO}  market for   Cut-off, U                                                      | lb   | amt_SodaAshfor Site X                                                   |
| Sulfuric acid {RoW}  market for sulfuric acid   Cut-off, U                                          | lb   | amt_H2SO4 for Site X                                                    |
| Lime, hydrated, loose weight {RoW}  production   Cut-off, U                                         | lb   | amt_CarbideLime for Site X                                              |
| Magnesium sulfate {GLO}  market for   Cut-off, U                                                    | lb   | amt_MgSO4 for Site X                                                    |
| Magnesium Bisulfite Proxy                                                                           | lb   | amt_MagBiS for Site X                                                   |
| Nitrogen, liquid {RoW}  market for   Cut-off, U                                                     | lb   | amt_N2 for Site X                                                       |
| Calcium chloride {RoW}  market for calcium chloride   Cut-off, U                                    | lb   | amt_CaCl for Site X                                                     |
| Anionic resin {RoW}  market for anionic resin   Cut-off, U                                          | lb   | amt_AnionicResin for Site X                                             |
| Cationic resin {RoW}  market for cationic resin   Cut-off, U                                        | lb   | amt_CationicResin for Site X                                            |
| Activated carbon, granular {RoW}  activated carbon production, granular from hard coal   Cut-off, U | lb   | amt_Carbon for Site X                                                   |
| Ammonia, liquid {RoW}  market for   Cut-off, U                                                      | lb   | amt_Ammonia for Site X                                                  |
| Sodium sulfite {RoW}  market for sodium sulfite   Cut-off, U                                        | lb   | amt_MBS for Site X                                                      |
| _Electricity, high voltage {MRO, U.S. only}   2018 EIA NERC production mix   Cut-off, U             | kWh  | amt_gridelec for Site X                                                 |
| Boiler Steam - non-coal sites                                                                       | BTU  | non-zero only for (technology family i = non-cogeneration without coal) |
| Boiler Steam - coal-burning sites                                                                   | BTU  | non-zero only for (technology family i=non- cogeneration with coal)     |

| Product(s)/Processes                                                   | Unit | Quantity Note                                                       |
|------------------------------------------------------------------------|------|---------------------------------------------------------------------|
| CHP Steam - non-coal sites                                             | BTU  | non-zero only for (technology family i = cogeneration without coal) |
| CHP Steam - coal sites                                                 | BTU  | non-zero only for (technology family i = cogeneration with coal)    |
| CHP Electricity - non-coal sites                                       | kWh  | non-zero only for (technology family i = cogeneration without coal) |
| CHP Electricity - coal sites                                           | kWh  | non-zero only for (technology family i = cogeneration with coal)    |
| <b>Waste to Treatment</b>                                              |      |                                                                     |
| Wastewater from maize starch production {GLO}  market for   Cut-off, U | gal  | wwt_onsite_vol for Site X                                           |
| Wastewater, unpolluted, from residence {GLO}  market for   Cut-off, U  | gal  | wwt_muni_vol for Site X                                             |
| <b>Emissions to air</b>                                                |      |                                                                     |
| Particulates, unspecified                                              | lb   | Aamt_Pmunsp for Site X                                              |
| Particulates, < 10 um                                                  | lb   | Aamt_PM10 for Site X                                                |
| Particulates, < 2.5 um                                                 | lb   | Aamt_PM25 for Site X                                                |
| Carbon monoxide                                                        | lb   | Aamt_CO for Site X                                                  |
| Nitrogen dioxide                                                       | lb   | Aamt_NO2 for Site X                                                 |
| Sulfur dioxide                                                         | lb   | Aamt_SO2 for Site X                                                 |
| VOC, volatile organic compounds, unspecified origin                    | lb   | Aamt_VOC for Site X                                                 |
| Acetaldehyde                                                           | lb   | Aamt_Acetaldehyde for Site X for Site X                             |
| Ammonia                                                                | lb   | Aamt_NH3 for Site X                                                 |
| Methanol                                                               | lb   | Aamt_Methanol for Site X                                            |
| Formaldehyde                                                           | lb   | Aamt_Formaldehyde for Site X                                        |
| Ethylene glycol                                                        | lb   | Aamt_EthyleneGlycol for Site X                                      |
| Mercury                                                                | lb   | Aamt_Hg for Site X                                                  |
| Lead                                                                   | lb   | Aamt_Pb for Site X                                                  |
| Hydrogen chloride                                                      | lb   | Aamt_HCl for Site X                                                 |
| Benzene, 1,4-dichloro-                                                 | lb   | Aamt_dichlorobenzene for Site X                                     |
| Toluene                                                                | lb   | Aamt_Toluene for Site X                                             |
| Benzene                                                                | lb   | Aamt_Benzene for Site X                                             |
| Nickel                                                                 | lb   | Aamt_Nickels for Site X                                             |
| Selenium                                                               | lb   | Aamt_Selenium for Site X                                            |
| Naphthalene                                                            | lb   | Aamt_Naphthalene for Site X                                         |
| Hydrogen cyanide                                                       | lb   | Aamt_HCN for Site X                                                 |
| Acrolein                                                               | lb   | Aamt_Acrolein for Site X                                            |
| <b>Emissions to Water</b>                                              |      |                                                                     |
| TOC, Total Organic Carbon                                              | lb   | amt_TOC_discharge for Site X                                        |

Table S-4: Unit process for Balanced Salt Solution, Based on ThermoFisher 14185

| Product(s)/Process | Amount | Unit | Notes & Sources |
|--------------------|--------|------|-----------------|
|--------------------|--------|------|-----------------|

| Product                                                                                                                                                                                                                                                                                                                                                                 |             |    |                                                                                                                                                                           |
|-------------------------------------------------------------------------------------------------------------------------------------------------------------------------------------------------------------------------------------------------------------------------------------------------------------------------------------------------------------------------|-------------|----|---------------------------------------------------------------------------------------------------------------------------------------------------------------------------|
| Balanced Salt Solution                                                                                                                                                                                                                                                                                                                                                  | 85.5        | kg |                                                                                                                                                                           |
| <b>Description:</b> Based on ThermoFisher 14185 - HBSS, 10x, no calcium, no magnesium, no phenol red 85.5g/L.<br><a href="https://www.thermofisher.com/us/en/home/technical-resources/media-formulation.157.html">https://www.thermofisher.com/us/en/home/technical-resources/media-formulation.157.html</a><br>Dextrose from supplier omitted because produced on site |             |    |                                                                                                                                                                           |
| Materials                                                                                                                                                                                                                                                                                                                                                               |             |    |                                                                                                                                                                           |
| Sodium chloride, powder {GLO}  market for   Cut-off, U                                                                                                                                                                                                                                                                                                                  | 80          | kg |                                                                                                                                                                           |
| Sodium phosphate {RoW}  market for sodium phosphate   Cut-off, U                                                                                                                                                                                                                                                                                                        | 0.9         | kg |                                                                                                                                                                           |
| Phosphoric acid, industrial grade, without water, in 85% solution state {GLO}  market for   Cut-off, U                                                                                                                                                                                                                                                                  | 0.432059849 | kg | combined with potassium hydroxide to get Potassium Phosphate monobasic (KH <sub>2</sub> PO <sub>4</sub> ) - 0.6g/L                                                        |
| Potassium hydroxide {GLO}  market for   Cut-off, U                                                                                                                                                                                                                                                                                                                      | 0.247369403 | kg | combined with phosphoric acid to get Potassium Phosphate monobasic (KH <sub>2</sub> PO <sub>4</sub> ) - 0.6g/L                                                            |
| Hydrochloric acid, without water, in 30% solution state {RoW}  market for   Cut-off, U                                                                                                                                                                                                                                                                                  | 1.956287281 | kg | combined with KOH to get KCl                                                                                                                                              |
| Potassium hydroxide {GLO}  market for   Cut-off, U                                                                                                                                                                                                                                                                                                                      | 3.010310484 | kg | combined with HCl to get KOH                                                                                                                                              |
| Water, deionised, from tap water, at user {RoW}  production   Cut-off, U                                                                                                                                                                                                                                                                                                | 998.953973  | kg | 1L water less water produced from KOH + H <sub>3</sub> PO <sub>4</sub> -> H <sub>2</sub> O + KH <sub>2</sub> PO <sub>4</sub> and from HCl + KOH -> H <sub>2</sub> O + KCl |

## S2. Corn Production Inventories

### S2.1 Relevant Parameters

Table S-1: Physical characteristics of corn

| Quantity                | Value  | Unit  | Notes & Sources                                                                                                                             |
|-------------------------|--------|-------|---------------------------------------------------------------------------------------------------------------------------------------------|
| Corn, Shelled           | 56     | lb/bu | USDA, <a href="ftp://www.ilga.gov/jcar/admincode/008/00800600ZZ9998bR.html">ftp://www.ilga.gov/jcar/admincode/008/00800600ZZ9998bR.html</a> |
| Corn Water Content      | 0.155  | kg/kg | USDA, <a href="ftp://www.ilga.gov/jcar/admincode/008/00800600ZZ9998bR.html">ftp://www.ilga.gov/jcar/admincode/008/00800600ZZ9998bR.html</a> |
| N Content Corn          | 0.0147 | kg/kg | (Peplinski et al. 1977)                                                                                                                     |
| Nitrogen immobilization | 28     | -     | corn/Midwest Corn (Ortiz-Reyes & Anex 2020)                                                                                                 |

Table S-2: Management practice and relevant Field Emissions Parameters for Corn

| Input parameters         | Unit          | Value | Uncertainty Information | Notes & Sources                                                                   |
|--------------------------|---------------|-------|-------------------------|-----------------------------------------------------------------------------------|
| <b>Management</b>        |               |       |                         |                                                                                   |
| Rotation                 | corn/corn/soy |       |                         |                                                                                   |
| Fraction Reduced Tillage | %             | 0.391 | [Undefined]             | Weighted average of catchment for participating facilities. (Claasen et al. 2018) |
| Fraction No Tillage      | %             | 0.249 | [Undefined]             | Weighted average of catchment for participating facilities. (Claasen et al. 2018) |



| Input parameters                                        | Unit       | Value | Uncertainty Information | Notes & Sources                                                                                                                      |
|---------------------------------------------------------|------------|-------|-------------------------|--------------------------------------------------------------------------------------------------------------------------------------|
| <b>Factors for Calculating IPCC NIR Field Emissions</b> |            |       |                         |                                                                                                                                      |
| <b>T<sub>base</sub></b>                                 | years      | 20    | [Undefined]             | default time                                                                                                                         |
| <b>SOC<sub>reference</sub></b>                          | t/ha       | 59.5  | [Normal 3.8]            | Table 2.3. IPCC2019R, assuming 50:50 high- and low-activity clay soils, 64%pm5%, 55%pm8%                                             |
| <b>N<sub>ag_T</sub></b>                                 | kg N/kg dm | 0.006 | [Normal 0.00045]        | maize AG 0.006, BG 0.007 pm75% = 2sigma<br>Table 11.1A p11.17 Crop Residue Above and Belowground N and Mass IPCC 2019R NIR GL        |
| <b>N<sub>bg_T</sub></b>                                 | kg N/kg dm | 0.007 | [Normal 0.00525]        | maize AG 0.006, BG 0.007 pm75% = 2sigma<br>Table 11.1A p11.17 Crop Residue Above and Belowground N and Mass IPCC 2019R NIR GL        |
| <b>R<sub>ag_T</sub></b>                                 | -          | 1     | [Undefined]             | maize corn 1, no uncertainty<br>Table 11.1A p11.17 Crop Residue Above and Belowground N and Mass IPCC 2019R NIR GL                   |
| <b>RS<sub>T</sub></b>                                   | -          | 0.22  | [Normal 0.0572]         | Table 11.1A p11.17 Ratio of Above and Belowground biomass IPCC 2019R NIR GL-maize /cane - perennial 0.8 pm 50% = 2sig                |
| <b>DRY<sub>T</sub></b>                                  | -          | 0.87  | [Undefined]             | Maize crop dry matter at harvest. default 0.87<br>Table 11.1A p11.17 Crop Residue Above and Belowground N and Mass IPCC 2019R NIR GL |
| <b>RbgT</b>                                             | -          | 2.65  | [Undefined]             | Table 11.1A p11.17 Crop Residue Above and Belowground N and Mass IPCC 2019R NIR GL maize                                             |
| <b>CropDM_IPCC</b>                                      | -          | 0.89  | [Undefined]             |                                                                                                                                      |
| <b>Frac_renew</b>                                       | -          | 1     | [Undefined]             | IPCC N2O emissions from managed soils factor. Annual crop = 1; N year crop = 1/N (sc =1/4)                                           |

## S2.2 Inventory

*Table S-1: Life Cycle Inventory for Consumption-weighted Corn Production. Weighted averages for each parameter are calculated as described in the associated Notes & Sources entry. Where possible, state-level data obtained from USDA NASS for the relevant states for 2010-2018 and a temporal average over three years centered around the study year (2017) calculated for each state. The temporal averages for each state were then used to calculate the consumption weighted average.*

| Inputs & Outputs for Corn Production | Unit    | Value  | Uncertainty Information        | Notes & Sources                                                                             |
|--------------------------------------|---------|--------|--------------------------------|---------------------------------------------------------------------------------------------|
| <b>Product(s)</b>                    |         |        |                                |                                                                                             |
| <b>Corn yield</b>                    | bu/ac   | 185.3  | [Normal 15.8]                  | USDA NASS                                                                                   |
| <b>Inputs</b>                        |         |        |                                |                                                                                             |
| <b>N fertilizer application rate</b> | lb N/ac | 150.5  | [Lognormal 1.145]              | scaled value across all acres from NASS data %ac in state treated * amount per treated acre |
| <b>P fertilizer application rate</b> | lb/ac   | 57.7   | [Lognormal 1.114]              | scaled value across all acres from NASS data %ac in state treated * amount per treated acre |
| <b>K fertilizer application rate</b> | lb/ac   | 63.55  | [Normal 10.4]                  | scaled value across all acres from NASS data %ac in state treated * amount per treated acre |
| <b>S fertilizer application rate</b> | lb/ac   | 15.56  | [Normal 4]                     | scaled value across all acres from NASS data %ac in state treated * amount per treated acre |
| <b>Lime application rate</b>         | lb/ac   | 510.0  | [Lognormal (3,3,2,3,3,na)1.25] | rescaled from (Gallagher et al. 2016)                                                       |
| <b>Fungicide application rate</b>    | lb/ac   | 0.056  | [Triangle 00.07]               | scaled value across all acres from NASS data %ac in state treated * amount per treated acre |
| <b>Herbicide application rate</b>    | lb/ac   | 0.4287 | [Triangle 0.40.45]             | scaled value across all acres from NASS data %ac in state treated * amount per treated acre |
| <b>Insecticide application rate</b>  | lb/ac   | 0.058  | [Triangle 00.093]              | scaled value across all acres from NASS data %ac in state treated * amount per treated acre |
| <b>Seeding rate</b>                  | lb/ac   | 23.23  | [Triangle 17.2626.8]           | USDA NASS                                                                                   |
| <b>Diesel Use</b>                    | gal/ac  | 11.9   | [Triangle 418]                 | rescaled from (Gallagher et al. 2016)                                                       |



|                                                                                          |         |         |                     |                                                                                                                                                                      |
|------------------------------------------------------------------------------------------|---------|---------|---------------------|----------------------------------------------------------------------------------------------------------------------------------------------------------------------|
| <b>Gasoline Use</b>                                                                      | gal/ac  | 1.88    | [Triangle 1.632.29] | IL, IA, NE, MN from state extension crop budgets; others rescaled from (Gallagher et al. 2016)                                                                       |
| <b>LPG Use</b>                                                                           | gal/ac  | 1.75    | [Triangle 1.333.33] | rescaled from (Gallagher et al. 2016)                                                                                                                                |
| <b>Natural Gas Use</b>                                                                   | cuft/ac | 26.21   | [Triangle 10110]    | rescaled from (Gallagher et al. 2016)                                                                                                                                |
| <b>Electricity Use</b>                                                                   | kWh/ac  | 17.31   | [Triangle 3.25108]  | rescaled from (Gallagher et al. 2016)                                                                                                                                |
| <b>Irrigation Water</b>                                                                  | gal/ac  | 108.433 | [Lognormal 1.5]     | share of irrigated acres at state level. scaled value across all acres from NASS data %ac in state treated * amount per treated acre; USDACV 9% [80.05887288; 182.7] |
| <b>Emissions to Air, Water and Soil calculated during modeling, average values below</b> |         |         |                     |                                                                                                                                                                      |
| Calculated in modeling using IPCC NIR                                                    |         |         |                     |                                                                                                                                                                      |

## S2.3 Unit Process(es)

Table S-1: Unit Processes Used for Corn Production.  $\text{NH}_3$ ,  $\text{N}_2\text{O}$ , and  $\text{CO}_2$  emissions to air are calculated parameters, values shown are single point values associated with the input quantities in this table only.

| Product(s)/Process(es)                                                                                                                                            | Value    | Unit             | Notes & Sources                                                                                |
|-------------------------------------------------------------------------------------------------------------------------------------------------------------------|----------|------------------|------------------------------------------------------------------------------------------------|
| <b>Product</b>                                                                                                                                                    |          |                  |                                                                                                |
| Corn Production at Farm, U.S. HFCS552017 Mix                                                                                                                      | 56       | lb               | per bushel                                                                                     |
| <b>Inputs</b>                                                                                                                                                     |          |                  |                                                                                                |
| Corn Production at Farm, U.S. HFCS552017 Mix                                                                                                                      | 0.125    | lb               | Seeding                                                                                        |
| Nitrogen Mix U.S. - effective N-P-K -S 60-0-0-1.4, per kg N                                                                                                       | 0.72     | lb               | N fertilizer based on nat'l use. N demand less N supplied by other fertilizers                 |
| Phosphates Mix U.S. - effective N-P-K 14.5-49-0, per kg P2O5                                                                                                      | 0.311    | lb               | P fertilizer based on nat'l use.                                                               |
| Potash Mix U.S. - effective N-P-K-S 0-0-59.3-1.2, per kg K2O                                                                                                      | 0.343    | lb               | K fertilizer based on nat'l use.                                                               |
| Sulfur {GLO}  market for   Cut-off, U                                                                                                                             | 0.0602   | lb               | Sulfur nutrient after accounting for other sources                                             |
| Lime {RoW}  market for lime   Cut-off, U                                                                                                                          | 2.75     | lb               | Liming                                                                                         |
| Herbicides Mix Corn                                                                                                                                               | 0.00231  | lb               | Herbicides used for corn, U.S., correlated to emissions                                        |
| Insecticides Mix Corn                                                                                                                                             | 0.000313 | lb               | Insecticides used for corn, U.S., correlated to emissions                                      |
| Fungicides Mix Corn                                                                                                                                               | 0.000302 | lb               | Fungicides used for corn, U.S., correlated to emissions                                        |
| Diesel, low-sulfur {GLO}  market group for   Cut-off, U                                                                                                           | 0.454    | lb               | Diesel for Use on Farm                                                                         |
| _Diesel Combustion In Agricultural Equipment, extracted from ei Sowing {CA-QC}   sowing   Cut-off, U                                                              | 0.454    | lb               | Combustion of Diesel on Farm                                                                   |
| Petrol, 4% ETBE additive by volume, with ethanol from biomass {GLO}  market for   Cut-off, U                                                                      | 0.0634   | lb               | Diesel for Use on Farm                                                                         |
| _Gasoline Combustion in Agricultural Equipment, extracted from ei Petrol, unleaded, burned in machinery {GLO}  petrol, unleaded, burned in machinery   Cut-off, U | 0.0634   | lb               | Combustion of Diesel on Farm                                                                   |
| Natural gas, high pressure {U.S.}  market for   Cut-off, U                                                                                                        | 0.141    | cuft             | Diesel for Use on Farm                                                                         |
| _Combustion of Natural gas, combusted in industrial boiler no upstream/U.S. U.S.LCI per m3 NG                                                                     | 0.141    | cuft             | Combustion of Diesel on Farm                                                                   |
| Liquefied petroleum gas {RoW}  market for   Cut-off, U                                                                                                            | 0.0527   | lb               | Diesel for Use on Farm                                                                         |
| _LPG, combusted in industrial boiler, at pulp and paper mill (EXCL.)/I/RNA                                                                                        | 0.00944  | gal              | Combustion of Diesel on Farm                                                                   |
| _Electricity, high voltage {MRO, U.S. only}   2018 EIA NERC production mix   Cut-off, U                                                                           | 0.0934   | kWh              | Non-irrigation electricity                                                                     |
| Transport, freight, lorry 16-32 metric ton, euro6 {RoW}  market for transport, freight, lorry 16-32 metric ton, EURO6   Cut-off, U                                | 0.0402   | tkm              | Transport of agrochemicals                                                                     |
| Water, unspecified natural origin, U.S.                                                                                                                           | 0.585    | gal              | Water for irrigation                                                                           |
| Occupation, agriculture                                                                                                                                           | 21.8     | m <sup>2</sup> a | Cropping                                                                                       |
| <b>Emissions to Air</b>                                                                                                                                           |          |                  |                                                                                                |
| Ammonia                                                                                                                                                           | 0.13     | lb               | NH3 offgassing - Direct emissions from fertilizers, residues and manure (IPCC NIR calculation) |
| Dinitrogen monoxide                                                                                                                                               | 0.0302   | lb               | Direct emissions from fertilizer and manure offgassing (IPCC NIR calculation)                  |

|                                     |          |    |                                                                                                       |
|-------------------------------------|----------|----|-------------------------------------------------------------------------------------------------------|
| Dinitrogen monoxide                 | 0.00185  | lb | Indirect emissions from fertilizers, residues and manure - volatilization (IPCC NIR calculation)      |
| Dinitrogen monoxide                 | 0.00498  | lb | Indirect emissions from fertilizers, residues and manure - leaching and runoff (IPCC NIR calculation) |
| Carbon dioxide                      | 0.271    | lb | CO2 from urea in field (IPCC NIR calculation)                                                         |
| Carbon dioxide, land transformation | 1.12     | lb | Emissions from land transformation (IPCC NIR calculation)                                             |
| Carbon dioxide                      | 1.21     | lb | CO2 from lime application (IPCC NIR calculation)                                                      |
| Glyphosate                          | 7.87E-05 | lb | Calculated pesticide partitioning (Margni et al. 2002)                                                |
| Atrazine                            | 6.02E-05 | lb | Calculated pesticide partitioning (Margni et al. 2002)                                                |
| Acetochlor                          | 4.40E-05 | lb | Calculated pesticide partitioning (Margni et al. 2002)                                                |
| Metolachlor, (S)                    | 3.24E-05 | lb | Calculated pesticide partitioning (Margni et al. 2002)                                                |
| Dimethenamid                        | 1.62E-05 | lb | Calculated pesticide partitioning. Used for other herbicides                                          |
| Chlorpyrifos                        | 7.83E-06 | lb | Calculated pesticide partitioning (Margni et al. 2002)                                                |
| Bifenthrin                          | 1.28E-05 | lb | Calculated pesticide partitioning (Margni et al. 2002)                                                |
| Tefluthrin                          | 4.38E-06 | lb | Calculated pesticide partitioning (Margni et al. 2002)                                                |
| Lambda-cyhalothrin                  | 6.26E-06 | lb | Calculated pesticide partitioning. Used for other insecticides                                        |
| Propiconazole                       | 6.65E-06 | lb | Calculated pesticide partitioning (Margni et al. 2002)                                                |
| Azoxystrobin                        | 4.84E-06 | lb | Calculated pesticide partitioning (Margni et al. 2002)                                                |
| Pyraclostrobin (prop)               | 1.42E-05 | lb | Calculated pesticide partitioning (Margni et al. 2002)                                                |
| Trifloxystrobin                     | 2.72E-06 | lb | Calculated pesticide partitioning (Margni et al. 2002)                                                |
| Difenoconazole                      | 1.81E-06 | lb | Calculated pesticide partitioning. Used for other fungicides                                          |
| <b>Emissions to Water</b>           |          |    |                                                                                                       |
| Nitrate, to groundwater             | 0.873    | lb | Leaching based on Ortiz-Reyes & Anex 2020                                                             |
| Phosphate, to ground water          | 0.218    | lb | Runoff based on Ortiz-Reyes & Anex 2018                                                               |
| Glyphosate                          | 6.69E-05 | lb | Calculated pesticide partitioning (Margni et al. 2002)                                                |
| Atrazine                            | 5.11E-05 | lb | Calculated pesticide partitioning (Margni et al. 2002)                                                |
| Acetochlor                          | 3.74E-05 | lb | Calculated pesticide partitioning (Margni et al. 2002)                                                |
| Metolachlor, (S)                    | 2.75E-05 | lb | Calculated pesticide partitioning (Margni et al. 2002)                                                |
| Dimethenamid                        | 1.38E-05 | lb | Calculated pesticide partitioning. Used for other herbicides                                          |
| Chlorpyrifos                        | 6.65E-06 | lb | Calculated pesticide partitioning (Margni et al. 2002)                                                |
| Bifenthrin                          | 1.09E-05 | lb | Calculated pesticide partitioning (Margni et al. 2002)                                                |
| Tefluthrin                          | 3.72E-06 | lb | Calculated pesticide partitioning (Margni et al. 2002)                                                |
| Lambda-cyhalothrin                  | 5.32E-06 | lb | Calculated pesticide partitioning. Used for other insecticides                                        |
| Propiconazole                       | 5.65E-06 | lb | Calculated pesticide partitioning (Margni et al. 2002)                                                |
| Azoxystrobin                        | 4.11E-06 | lb | Calculated pesticide partitioning (Margni et al. 2002)                                                |
| Pyraclostrobin (prop)               | 1.21E-05 | lb | Calculated pesticide partitioning (Margni et al. 2002)                                                |
| Trifloxystrobin                     | 2.31E-06 | lb | Calculated pesticide partitioning (Margni et al. 2002)                                                |
| Fungicides, unspecified             | 1.54E-06 | lb | Calculated pesticide partitioning. Used for other fungicides                                          |
| <b>Emissions to Soil</b>            |          |    |                                                                                                       |
| Atrazine                            | 0.00046  | lb | Calculated pesticide partitioning (Margni et al. 2002)                                                |
| Glyphosate                          | 0.000602 | lb | Calculated pesticide partitioning (Margni et al. 2002)                                                |
| Acetochlor                          | 0.000336 | lb | Calculated pesticide partitioning (Margni et al. 2002)                                                |
| Metolachlor, (S)                    | 0.000248 | lb | Calculated pesticide partitioning (Margni et al. 2002)                                                |
| Dimethenamid                        | 0.000124 | lb | Calculated pesticide partitioning. Used for other herbicides                                          |
| Chlorpyrifos                        | 5.99E-05 | lb | Calculated pesticide partitioning (Margni et al. 2002)                                                |
| Bifenthrin                          | 9.82E-05 | lb | Calculated pesticide partitioning (Margni et al. 2002)                                                |
| Tefluthrin                          | 3.35E-05 | lb | Calculated pesticide partitioning (Margni et al. 2002)                                                |
| Lambda-cyhalothrin                  | 4.79E-05 | lb | Calculated pesticide partitioning. Used for other insecticides                                        |
| Propiconazole                       | 5.09E-05 | lb | Calculated pesticide partitioning (Margni et al. 2002)                                                |
| Azoxystrobin                        | 3.70E-05 | lb | Calculated pesticide partitioning (Margni et al. 2002)                                                |
| Pyraclostrobin (prop)               | 0.000109 | lb | Calculated pesticide partitioning (Margni et al. 2002)                                                |
| Trifloxystrobin                     | 2.08E-05 | lb | Calculated pesticide partitioning (Margni et al. 2002)                                                |
| Fungicides, unspecified             | 1.39E-05 | lb | Calculated pesticide partitioning. Used for other fungicides                                          |

## S2.4 Inventories & Unit processes for agrochemical inputs

Table S-1: Unit Processes for Primary Nutrient Mixes U.S., from USDA NASS data

| Product(s)/Process(es)                                      | Quantity | Unit | Quantity Uncertainty |      |      |
|-------------------------------------------------------------|----------|------|----------------------|------|------|
| Product(s)                                                  |          |      |                      |      |      |
| Nitrogen Mix U.S. - effective N-P-K -S 60-0-0-1.4, per kg N | 1        | kg   |                      |      |      |
| Materials/fuels                                             |          |      |                      |      |      |
| Urea, as N {GLO}  market for   Cut-off, U                   | 0.513    | kg   | Uniform              | 0.5  | 0.52 |
| Ammonia, liquid {RoW}  market for   Cut-off, U              | 0.428    | kg   | Uniform              | 0.41 | 0.45 |
| Ammonium sulfate, as N {GLO}  market for   Cut-off, U       | 0.059    | kg   | Uniform              | 0.03 | 0.09 |

| Product(s)/Process(es)                                                              | Quantity | Unit | Quantity Uncertainty |
|-------------------------------------------------------------------------------------|----------|------|----------------------|
| Product(s)                                                                          |          |      |                      |
| Phosphates Mix U.S. - effective N-P-K 14.5-49-0, per kg P2O5                        | 1        | kg   |                      |
| Materials/fuels                                                                     |          |      |                      |
| Phosphate fertiliser, as P2O5 {RoW}  diammonium phosphate production   Cut-off, U   | 0.5      | kg   | Undefined            |
| Phosphate fertiliser, as P2O5 {RoW}  monoammonium phosphate production   Cut-off, U | 0.5      | kg   | Undefined            |

| Product(s)/Process(s)                                        | Quantity | Unit | Quantity Uncertainty |      |      |
|--------------------------------------------------------------|----------|------|----------------------|------|------|
| Product(s)                                                   |          |      |                      |      |      |
| Potash Mix U.S. - effective N-P-K-S 0-0-59.3-1.2, per kg K2O | 1        | kg   |                      |      |      |
| Materials/fuels                                              |          |      |                      |      |      |
| Potassium chloride, as K2O {GLO}  market for   Cut-off, U    | 0.93     | kg   | Uniform              | 0.89 | 0.96 |
| Potassium sulfate, as K2O {GLO}  market for   Cut-off, U     | 0.93     | kg   | Uniform              | 0.89 | 0.96 |

Table S-2: Unit Process for the Herbicide Mix, weighted averages of USDA NASS 2014-2018 data (3-year average)

| Product(s)/Process(es)                                                  | Quantity      | Unit | Quantity Uncertainty |      |      | Fit for Purpose Uncertainty if applied |                |      |
|-------------------------------------------------------------------------|---------------|------|----------------------|------|------|----------------------------------------|----------------|------|
| Product(s)                                                              |               |      |                      |      |      |                                        |                |      |
| Herbicides Mix Corn                                                     | 1             | kg   |                      |      |      |                                        |                |      |
| Materials/fuels                                                         |               |      |                      |      |      |                                        |                |      |
| Glyphosate {GLO}  market for   Cut-off, U                               | 0.34          | kg   | Uniform              | 0.31 | 0.36 | Lognormal                              | (1,2,1,2,1,na) | 1.06 |
| Atrazine {GLO}  market for   Cut-off, U                                 | 0.26          | kg   | Uniform              | 0.25 | 0.27 | Lognormal                              | (1,2,1,2,1,na) | 1.06 |
| Acetamide-anillide-compound, unspecified {GLO}  market for   Cut-off, U | 0.19          | kg   | Uniform              | 0.18 | 0.21 | Lognormal                              | (1,2,1,2,1,na) | 1.06 |
| Metolachlor {GLO}  market for   Cut-off, U                              | 0.14          | kg   | Lognormal            | 1.07 |      | Lognormal                              | (1,2,1,2,1,na) | 1.06 |
| Pesticide, unspecified {GLO}  market for   Cut-off, U                   | by difference | kg   | by difference        |      |      | Lognormal                              | (1,2,1,2,1,na) | 1.06 |

Table S-3: Unit Process for the Insecticide Mixes, weighted averages of USDA NASS 2014-2018 data (3-year average)

| Product(s)/Process(es)                                                | Quantity      | Unit | Quantity Uncertainty |     |      | Fit for Purpose Uncertainty if applied |                |          |  |
|-----------------------------------------------------------------------|---------------|------|----------------------|-----|------|----------------------------------------|----------------|----------|--|
| Product(s)                                                            |               |      |                      |     |      |                                        |                |          |  |
| Insecticides Mix Corn                                                 | 1             | kg   |                      |     |      |                                        |                |          |  |
| Materials/fuels                                                       |               |      |                      |     |      |                                        |                |          |  |
| Organophosphorus-compound, unspecified {GLO}  market for   Cut-off, U | 0.25          | kg   | Triangle             | 0   | 0.5  | Lognormal                              | (1,2,1,2,1,na) | 1.0<br>6 |  |
| Pyrethroid-compound {GLO}  market for   Cut-off, U                    | 0.41          | kg   | Uniform              | 0.3 | 0.47 | Lognormal                              | (1,2,1,2,1,na) | 1.0<br>6 |  |
| Pyrethroid-compound {GLO}  market for   Cut-off, U                    | 0.14          | kg   | Uniform              | 0.1 | 0.3  | Lognormal                              | (1,2,1,2,1,na) | 1.0<br>6 |  |
| Pesticide, unspecified {GLO}  market for   Cut-off, U                 | by difference | kg   | by difference        |     |      | Lognormal                              | (1,2,1,2,1,na) | 1.0<br>6 |  |

Table S-4: Unit Process used to represent the fungicides mixes, weighted averages of USDA NASS 2014-2018 data (3-year average)

| Product(s)/Process(es)                                | Quantity      | Unit | Quantity Uncertainty |      |      | Fit for Purpose Uncertainty if applied |                |      |  |
|-------------------------------------------------------|---------------|------|----------------------|------|------|----------------------------------------|----------------|------|--|
| Product(s)                                            |               |      |                      |      |      |                                        |                |      |  |
| Fungicides Mix Corn                                   | 1             | kg   |                      |      |      |                                        |                |      |  |
| Materials/fuels                                       |               |      |                      |      |      |                                        |                |      |  |
| Pesticide, unspecified {GLO}  market for   Cut-off, U | 0.47          | kg   | Uniform              | 0.35 | 0.53 | Lognormal                              | (1,2,1,2,1,na) | 1.06 |  |
| Pesticide, unspecified {GLO}  market for   Cut-off, U | 0.22          | kg   | Uniform              | 0.22 | 0.23 | Lognormal                              | (1,2,1,2,1,na) | 1.06 |  |
| Pesticide, unspecified {GLO}  market for   Cut-off, U | 0.16          | kg   | Uniform              | 0.12 | 0.23 | Lognormal                              | (1,2,1,2,1,na) | 1.06 |  |
| Pesticide, unspecified {GLO}  market for   Cut-off, U | 0.09          | kg   | Uniform              | 0.04 | 0.12 | Lognormal                              | (1,2,1,2,1,na) | 1.06 |  |
| Pesticide, unspecified {GLO}  market for   Cut-off, U | by difference | kg   | by difference        |      |      |                                        |                |      |  |

### S3. Agriculture Field Emissions Calculations

Field emissions other than pesticides were calculated based on the IPCC National Inventory Report (NIR) guidance (IPCC 2006, IPCC 2019), with Tier 2 parameters where possible.

Rather than calculating the field emissions exogenously, the NIR equations (reproduced below the tables) were calculated endogenously during modeling (entered as calculated parameters in the crop production unit processes) using the associated parameters (Table) so field emissions automatically responded to changes in field applications during sensitivity analysis. The NIR equations were.

Parameter values are in Table S-1 and primary equations used are provided below the table.

*Table S-1: IPCC NIR Emissions and Land Use Parameters (Tier 1, Tier 2) used in this study.*

| Parameter Name        | Value | Unit                                   | Uncertainty Information |       | Source Notes                                                                                                                |                                                                                                                                                                                                    |
|-----------------------|-------|----------------------------------------|-------------------------|-------|-----------------------------------------------------------------------------------------------------------------------------|----------------------------------------------------------------------------------------------------------------------------------------------------------------------------------------------------|
| <b>F_lu_cult_trop</b> | 0.83  | -                                      | Normal                  | 0.04  | Table 5.5 Updated - Relative Carbon Stock Change Factors for management activities on cropland; IPCC NIR GL 2019 Refinement |                                                                                                                                                                                                    |
| <b>F_lu_cult_temp</b> | 0.69  | -                                      | Normal                  | 0.05  | Table 5.5 Updated - Relative Carbon Stock Change Factors for management activities on cropland; IPCC NIR GL 2019 Refinement |                                                                                                                                                                                                    |
| <b>F_lu_setaside</b>  | 0.82  | -                                      | Normal                  | 0.08  | Table 5.5 Updated - Relative Carbon Stock Change Factors for management activities on cropland; IPCC NIR GL 2019 Refinement |                                                                                                                                                                                                    |
| <b>F_mg_notill</b>    | 1.1   | -                                      | Normal                  | 0.022 | Table 5.5 Updated - Relative Carbon Stock Change Factors for management activities on cropland; IPCC NIR GL 2019 Refinement |                                                                                                                                                                                                    |
| <b>F_mg_redtill</b>   | 1.05  | -                                      | Normal                  | 0.02  | Table 5.5 Updated - Relative Carbon Stock Change Factors for management activities on cropland; IPCC NIR GL 2019 Refinement |                                                                                                                                                                                                    |
| <b>F_mg_fulltill</b>  | 1     | -                                      | Undefined               |       | Table 5.5 Updated - Relative Carbon Stock Change Factors for management activities on cropland; IPCC NIR GL 2019 Refinement |                                                                                                                                                                                                    |
| <b>F_i_med</b>        | 1     | -                                      | Undefined               |       | Table 5.5 Updated - Relative Carbon Stock Change Factors for management activities on cropland; IPCC NIR GL 2019 Refinement |                                                                                                                                                                                                    |
| <b>F_i_hinoman</b>    | 1.11  | -                                      | Normal                  | 0.055 | Table 5.5 Updated - Relative Carbon Stock Change Factors for management activities on cropland; IPCC NIR GL 2019 Refinement |                                                                                                                                                                                                    |
| <b>F_i_hiwman</b>     | 1.44  | -                                      | Normal                  | 0.094 | Table 5.5 Updated - Relative Carbon Stock Change Factors for management activities on cropland; IPCC NIR GL 2019 Refinement |                                                                                                                                                                                                    |
| <b>N2O_EF1</b>        | 0.01  | kg N <sub>2</sub> O-N/kg N             | Uniform                 | 0.001 | 0.018                                                                                                                       | Table 11.1, 2019 Refinement                                                                                                                                                                        |
| <b>N2O_EF1_sn</b>     | 0.016 | kg N <sub>2</sub> O-N/kg N             | Uniform                 | 0.013 | 0.019                                                                                                                       | direct N2O emissions factor for synthetic N, Tier 2. IPCC Table 11.1 Updated, NIR GL 2019 Refinement. for "wet" climates. Used in Eqn 11.2                                                         |
| <b>N2O_EF1_os</b>     | 0.006 | kg N <sub>2</sub> O-N/kg N             | Uniform                 | 0.001 | 0.011                                                                                                                       | direct N2O emissions factor for other N - biomass residues, organic matter, manures, SOM breakdowns, Tier 2. IPCC Table 11.1 Updated, NIR GL 2019 Refinement. for "wet" climates. Used in Eqn 11.2 |
| <b>N2O_EF4</b>        | 0.01  | kg N <sub>2</sub> O-N/kg N volatilized | Uniform                 | 0.002 | 0.05                                                                                                                        | Default value for N volatilization and re-deposition Table 11.3 (Updated) Updated, NIR GL 2019. Used in equation 11.9                                                                              |
| <b>N2O_EF4_wet</b>    | 0.014 | kg N <sub>2</sub> O-N/kg N volatilized | Uniform                 | 0.011 | 0.017                                                                                                                       | N volatilization and re-deposition in wet climates Table 11.3 (Updated) Updated, NIR GL 2019 equation 11.9                                                                                         |
| <b>N2O_EF4_dry</b>    | 0.005 | kg N <sub>2</sub> O-N/kg N volatilized | Uniform                 | 0     | 0.011                                                                                                                       | N volatilization and re-deposition in dry climates Table 11.3 (Updated) Updated, NIR GL 2019 equation 11.9                                                                                         |
| <b>N2O_EF5</b>        | 0.011 | kg N <sub>2</sub> O-N/kg N runoff      | Uniform                 | 0     | 0.02                                                                                                                        | Leaching/runoff factor, Table 11.3 (Updated) Updated, NIR GL 2019 used in equation 11.10<br>kg N <sub>2</sub> O-N/ (kg NH <sub>3</sub> -N + NO <sub>x</sub> -N volatilized)                        |

| Parameter Name               | Value                              | Unit                          | Uncertainty Information |         |                                            | Source Notes                                                                                                                                                |
|------------------------------|------------------------------------|-------------------------------|-------------------------|---------|--------------------------------------------|-------------------------------------------------------------------------------------------------------------------------------------------------------------|
| N2O_FracGASF                 | 0.1                                | kg N volatilized/kg N applied | Uniform                 | 0.03    | 0.3                                        | For synthetic fertilizer Table 11.3, used in equation 11.11                                                                                                 |
| N2O_FracGASF_Urea            | 0.15                               | kg N volatilized/kg N applied | Uniform                 | 0.03    | 0.43                                       | For synthetic fertilizer Table 11.3, kg N volatilized/kg N applied                                                                                          |
| N2O_FracGASF_ammonium        | 0.08                               | kg N volatilized/kg N applied | Uniform                 | 0.02    | 0.3                                        | For synthetic fertilizer Table 11.3, kg N volatilized/kg N applied                                                                                          |
| N2O_FracGASF_nitrate         | 0.01                               | kg N volatilized/kg N applied | Uniform                 | 0       | 0.03                                       | For synthetic fertilizer Table 11.3, kg N volatilized/kg N applied                                                                                          |
| N2O_FracGASF_ammoniumnitrate | 0.05                               | kg N volatilized/kg N applied | Uniform                 | 0       | 0.2                                        | For synthetic fertilizer Table 11.3, kg N volatilized/kg N applied                                                                                          |
| N2O_FracGASF_eff             | Calculated based on fertilizer mix |                               |                         |         | Weighted FracGASF based on synthetic N mix |                                                                                                                                                             |
| N2O_FracGASM                 | 0.21                               | kg N volatilized/kg N applied | Uniform                 | 0       | 0.31                                       | IPCC Table 11.3 2019 Refinement for MANURE (not used)                                                                                                       |
| N2O_FracLEACHh               | 0.24                               | kg N volatilized/kg N applied | Uniform                 | 0.1     | 0.8                                        | N losses by leaching/runoff in wet climates IPCC Table 11.3, 2019 Refinement                                                                                |
| CO2_EF_lime                  | 0.12                               | tonne CO2-C/tonne lime        | Undefined               |         |                                            | tonne CO2-C/tonne lime, IPCC 2006 Sect 11.3.2 Tier 1 default                                                                                                |
| CO2_EF_urea                  | 0.2                                | tonne CO2-C/tonne urea        | Uniform                 | 0.1     | 0.2                                        | tonne CO2-C/tonne urea, IPCC 2006 Eqn 11.13 Tier 1 default 0.2, uncertainty -50%                                                                            |
| Gef_CO2_biogenic             | 1515                               | g/kg dry matter burnt         | Normal                  | 177     |                                            | Table 2.5 Emissions factors (g/kg dry matter burnt) for biomass burning (ag residues) IPCC 2019 Refinement                                                  |
| Gef_CO                       | 92                                 | g/kg dry matter burnt         | Normal                  | 84      |                                            | Table 2.5 Emissions factors (g/kg dry matter burnt) for biomass burning (ag residues) IPCC 2019 Refinement                                                  |
| Gef_N2O                      | 0.07                               | g/kg dry matter burnt         | Undefined               |         |                                            | Table 2.5 Emissions factors (g/kg dry matter burnt) for biomass burning (ag residues) IPCC 2019 Refinement                                                  |
| Gef_CH4                      | 2.7                                | g/kg dry matter burnt         | Undefined               |         |                                            | Table 2.5 Emissions factors (g/kg dry matter burnt) for biomass burning (ag residues) IPCC 2019 Refinement                                                  |
| Gef_NOx                      | 2.5                                | g/kg dry matter burnt         | Normal                  | 1       |                                            | Table 2.5 Emissions factors (g/kg dry matter burnt) for biomass burning (ag residues) IPCC 2019 Refinement                                                  |
| T_default                    | 20                                 | Years                         |                         |         | Default time occupancy                     |                                                                                                                                                             |
| SOC_ref                      | 59.5                               | Tonne/ha                      | Normal                  | 3.8     |                                            | Soil Organic Carbon reference value. Table 2.3. IPCC2019, assuming 50:50 high- and low-activity clay soils, 64%±5%, 55%±8%. ± is 95%cl as % of mean. (=2SD) |
| N_ag_T corn                  | 0.006                              | kg N/kg dm                    | Normal                  | 0.0145  |                                            | Table 11.1A p11.17 Crop Residue Above and Belowground N and Mass IPCC 2019R NIR GL. maize 0.006±75% / 0.019±75%                                             |
| N_bg_T                       | 0.014                              | kg N/kg dm                    | Normal                  | 0.01505 |                                            | Table 11.1A p11.17 Crop Residue Above and Belowground N and Mass IPCC 2019R NIR GL.                                                                         |
| R_ag_T corn                  | 1                                  | kg N/kg dm                    | Undefined               |         |                                            | Table 11.1A p11.17 Crop Residue Above and Belowground N and Mass IPCC 2019R NIR GL. corn 1, no uncertainty                                                  |
| RS_T corn                    | 0.22                               | kg N/kg dm                    | Normal                  | 0.1     |                                            | Table 11.1A p11.17 Crop Residue Above and Belowground N and Mass IPCC 2019R NIR GL. Table 11.1A corn 0.22 ± 26%                                             |
| R_c2c                        | 10                                 | -                             | Undefined               |         |                                            | C:N ratio for cropland remaining cropland,, IPCC 2019R page 11.20                                                                                           |
| Yield_wheat                  | 86                                 | Ton/ac                        | Triangle                | 77      | 92                                         | From NASS for SOC change with rotation                                                                                                                      |
| Frac_renew_annual            | 1                                  | -                             | Undefined               |         |                                            | IPCC N2O emissions from managed soils factor. Annual crop = 1; N year crop = 1/N (sc =1/4)                                                                  |
| Frac_renew_4year             | 0.25                               |                               |                         |         |                                            |                                                                                                                                                             |

**Equation 11.2****Direct N<sub>2</sub>O Emissions from Managed Soils (Tier 2)**

$$N_2O - N = \sum_i (F_{SN} + F_{ON})_i * EF_{1i} + (F_{CR} + F_{SOM}) * EF_1 + N_2O - N_{OS} + N_2O - N_{PRP}$$

$N_2O - N$  = annual direct N<sub>2</sub>O – N emissions produced from managed soils, kg N<sub>2</sub>O – N yr<sup>-1</sup>

$N_2O - N_{N \text{ inputs}}$  = annual direct N<sub>2</sub>O – N emissions produced from N inputs to managed soils, kg N<sub>2</sub>O – N yr<sup>-1</sup>

$N_2O - N_{OS}$  = annual direct N<sub>2</sub>O – N emissions produced managed organic soils, kg N<sub>2</sub>O – N yr<sup>-1</sup>

$N_2O - N_{PRP}$  = annual direct N<sub>2</sub>O – N emissions produced from urine and dung inputs to grazed soils, kg N<sub>2</sub>O – N yr<sup>-1</sup>

$F_{SN}$  = annual amount of synthetic fertilizer N inputs to soils, kg N yr<sup>-1</sup>

$F_{ON}$   
= annual amount of animal manure, compost, sewage sludge and other organic N additions applied to soils, kg N yr<sup>-1</sup>

$F_{CR}$  = annual amount of N in crop residues (above ground and below ground) including N  
– fixing crops, and from forage or pasture, returned to soils annually, kg N yr<sup>-1</sup>

$F_{SOM}$   
= annual amount of N in minerals soils that is mineralized, in association with loss of soil C fom soil organic matter  
as a result of changes to land use management, kg N yr<sup>-1</sup>

$F_{OS}$   
= annual area of managed or drained organic soils, ha (Note: the subscripts CG, F, Temp, Trop, NR and NP refer to Cropland and

$F_{PRP}$   
= annual amount of urine and dung N deposited by grazing animals on pasture, range and paddock, kg N yr<sup>-1</sup>, (Note: the subsc

$EF_1$  = emission factor for N<sub>2</sub>O emissions from N inputs, kg N<sub>2</sub>O – N (kg N input)<sup>-1</sup> (Table 11.1)

$EF_{1FR}$  = emission factor for N<sub>2</sub>O emissions from N inputs to flooded rice, kg N<sub>2</sub>O – N (kg N input)<sup>-1</sup> (Table 11.1)<sup>4</sup>

$EF_2$   
= emission factor for N<sub>2</sub>O emissions from drained or managed organic soils, kg N<sub>2</sub>O  
– N (kg N input)<sup>-1</sup>, (See guidance in 2013 Supplement to the 2006 IPCC Guidelines for National Greenhouse Gas Inventories: Wetl  
– 5 where further disaggregation by climate and land use is available) (Note: the subscripts CG, F, Temp, Trop, NR and NP refer toC

$EF_1$   
= emission factor for N<sub>2</sub>O emissions from urine and dung N deposited on pasture, range and paddock by grazing ani  
– N (kg N input)<sup>-1</sup>, (Table 11.1) (Note: the subscripts CPP and SO refer to Cattle, Poultry and Pigs, and Sheep and Other animals, respec

| Parameter Name | Value | Unit            |
|----------------|-------|-----------------|
| N2O_EF1        | 0.01  | kg N2O-N / kg N |

**Equation 11.9****N<sub>2</sub>O From Atmospheric Deposition of N Volatilize from Managed Soils (Tier 1)**

$$N_2O_{(ATD)} - N = [(F_{SN} * Frac_{GASF}) + ((F_{ON} + F_{PRP}) * Frac_{GASM})] * EF_4$$

$N_2O_{(ATD)} - N$  = annual direct N<sub>2</sub>O – N produced from atmospheric deposition of N volatilized from managed soils, kg N<sub>2</sub>O – N yr<sup>-1</sup>

$F_{SN}$  = annual amount of synthetic fertilizer N inputs to soils, kg N yr<sup>-1</sup>

$Frac_{GASF}$   
= fraction of synthetic fertilizer N that volatilizes as NH<sub>3</sub> and NO<sub>x</sub>, kg N volatilized (kg of N applied)<sup>-1</sup> (Table 11.3)

$F_{ON}$   
= annual amount of animal manure, compost, sewage sludge and other organic N additions applied to soils, kg N yr<sup>-1</sup>

$F_{PRP}$  = annual amount of urine and dung N deposited by grazing animals on pasture, range and paddock, kg N yr<sup>-1</sup>,

$Frac_{GASM}$   
= fraction of applied organic N fertilizer materials ( $F_{ON}$ ) and of urine and dung N deposited by grazing animals ( $F_{PRP}$ ), that vol

$EF_4$  = emission factor for N<sub>2</sub>O emissions from atmospheric deposition of N on soils and water surfaces, [kg N – N<sub>2</sub>O (kg NH<sub>3</sub> – N + NO<sub>x</sub> – N volatilized)<sup>-1</sup>] (Table 11.3)

Conversion of  $N_2O_{(ATO)}$   
– N emissions to N<sub>2</sub>O emissions for reporting purposes is performed by using the following equation:

$$N_2O_{(ATO)} = N_2O_{(ATD)} - N * 44/28$$

| Parameter Name | Value | Unit                            |
|----------------|-------|---------------------------------|
| N2O_EF4        | 0.01  | kg N2O-N / kg N volatilized     |
| N2O_FracGASF   | 0.1   | kg N volatilized / kg N applied |
| N2O_FracGASM   | 0.21  | kg N volatilized / kg N applied |

**Equation 11.11****N<sub>2</sub>O From Atmospheric Deposition of N Volatilize from Managed Soils (Tier 2)**

$$N_2O_{(ATD)} - N = \left\{ \sum_i (F_{SN_i} * Frac_{GASF_i}) + [(F_{ON} + F_{PRP}) * Frac_{GASM}] \right\} * EF_4$$

$N_2O_{(ATD)} - N$  = annual direct N<sub>2</sub>O – N produced from atmospheric deposition of N volatilized from managed soils, kg N<sub>2</sub>O – N yr<sup>-1</sup>

$F_{SN_i}$  = annual amount of synthetic fertilizer N inputs to soils under different conditions i, kg N yr<sup>-1</sup>

$Frac_{GASF}$   
= fraction of synthetic fertilizer N that volatilizes as NH<sub>3</sub> and NO<sub>x</sub> under different conditions i, kg N volatilized (kg of N applied)<sup>-1</sup>



| Parameter Name | Value | Unit                            |
|----------------|-------|---------------------------------|
| N2O_FracGASF   | 0.1   | kg N volatilized / kg N applied |

### Equation 11.11

#### N<sub>2</sub>O From N Leaching/Runoff from Managed Soils in Regions where Leaching/Runoff Occurs (Tier 1)

$$N_2O_{(L)} - N = (F_{SN} + F_{ON} + F_{PRP} + F_{CR} + F_{SOM}) * Frac_{LEACH-(H)} * EF_5$$

### Equation 11.6

#### N from Crop Residues and Forage/Pasture Renewal (Tier 1)

$$F_{CR} = \sum_T \{ [AGR_{(T)} * N_{AG(T)} * (1 - Frac_{Remove(T)} - (Frac_{Burnt(T)} * C_f))] + [BGR_{(T)} * N_{BG(T)}] \}$$

$$N_2O_{(ATD)} = N_2O_{(ATD)} - N * 44/28$$

$$BGR_{(T)} = (Crop_{(T)} + AG_{DM(T)}) * RS_{(T)} * Area_{(T)} * Frac_{Renew(T)}$$

$F_{CR}$  = annual amount of N in crop residues (above ground and below ground) including N – fixing crops, and from forage or pasture, returned to soils annually, kg N yr<sup>-1</sup>

$AGR_{(T)}$  = annual total amount of above ground crop residue for crop T, kg d. m. yr<sup>-1</sup>.

$N_{AG(T)}$  = N content of above ground residues for crop T, kg N (kg d. m.)<sup>-1</sup> (Table 11.1a)

$Frac_{Remove(T)}$

= fraction of above ground residues of crop T removed annually for purposes, such as feed, bedding and construction, dimensions

$Frac_{Burnt(T)}$  = fraction of annual harvested area of crop T burnt, dimensionless

$C_f$  = combustion factor (dimensionless) (refer to Chaoter 2, Table 2.6)

### Equation 2.27

#### Estimation of Greenhouse Gas Emissions from Fire

$$L_{fire} = A * M_B * C_f * G_{ef} * 10^{-3}$$

$L_{fire}$  = amount of greenhouse gas emissions from fire, tonnes of each GHG e. g., CH<sub>4</sub>, N<sub>2</sub>O, etc.

$A$  = area burnt, ha

$C_f$  = combustion factor (dimensionless) (refer to Chaoter 2, Table 2.6)

$M_B$   
= mass of fuel available for combustion, tonnes  $ha^{-1}$ . This includes biomass, ground liter and dead wood, When Tier 1 methods – use change (see Section 2.3.2.2).

$G_{ef}$  = emission factor,  $g\ kg^{-1}$  dry matter burnt (default values in Table 2.5)

### Equation 2.14

#### Annual Carbon Losses in Biomass Due to Disturbances

$$L_{disturbance} = \{A_{disturbance} * B_W * (1 + R) * CF * fd\}$$

$L_{fire}$   
= annual other losses of carbon, tonnes  $Cyr^{-1}$ , (Note that this is the amount of biomass that is lost from the total biomass. transferred to dead organic matter and biomass that is oxidized, and released to the atmosphere is explained in Equations 2.13)

$A_{disturbance}$  = area affected by disturbances,  $ha\ yr^{-1}$

$B_W$  = average above ground biomass of land areas affected by disturbances, tonnes d.m.  $ha^{-1}$

$R$   
= ratio of below ground biomass to above biomass, in tonne d.m. below ground biomass, (tonne d.m. above ground biomass) $^{-1}$ .

$CF$  = carbon fraction of dry matter, tonne C (tonne d.m.) $^{-1}$

$fd$  = fraction of biomass lost in disturbance (see note below)

### Equation 2.25

#### Annual Change in Organic Carbon Stocks in Mineral Soils

$$\Delta C_{mineral} = \frac{(SOC_0 - SOC_{(0-T)})}{D}$$

$$SOC_{Mineral} = \sum_{c,s,i} (SOC_{0\ c,s,i} * F_{LU\ c,s,i} * F_{MG\ c,s,i} * F_{I\ c,s,i} * A_{c,s,i})$$

$\Delta C_{mineral}$  = annual change in organic C stocks in mineral soils, tonnes C  $yr^{-1}$

$SOC_{(0-T)}$  = mineral soil organic C stock ( $SOC_{Mineral}$ ) at the beginning of the inventory time period, tonnes C

$SOC_0$  = mineral soil organic C stock ( $SOC_{Mineral}$ ) at the last year of the inventory time period, tonnes C

$T$  = number of years over a single inventory time period, yr

$D$   
= time dependence of mineral soil organic C stock change factors, which is the default time period for transition between equilibrium – T years).

$c$  = represents the climate zones included in the inventory

$s$  = represents the soil types included in the inventory

$i$  = represents the set of management systems included in the inventory.

$SOC_{Mineral}$  = total mineral soil organic C stock at defined time, tonnes C

$SOC_{REF\ c,s,i}$  = the soil organic C stock for mineral soils in the reference condition, tonnes C  $ha^{-1}$  (Table 2.3)

$F_{LU_{c,x,i}}$  = stock change factor for mineral soil organic C land – use systems or sub  
– systems for a particular land use, dimensionless

$F_{MG_{c,x,i}}$  = stock change factor for mineral soil organic C for management regime, dimensionless

$F_{I_{c,x,i}}$  = stock change factor for mineral soil organic C for the input of organic amendments, dimensionless

$A_{c,x,i}$  = land area of the stratum being estimated, ha

| Parameter Name | Value | Unit       |
|----------------|-------|------------|
| SOC_ref        | 59.5  | Tonne / ha |
